# Supplementary material for: Bacterial meningitis: Aetiology, risk factors, disease trends and severe sequelae during 50 years in Sweden
Source: PubMed Central journal article supplement (PMC9544249; doi:10.1111/joim.13488), 2022-04-03
Supplement: JOIM-292-350-s001.pdf [file JOIM-292-350-s001.pdf]

## SUPPLEMENTARY APPENDIX

### SUPPLEMENTARY MATERIAL and METHODS

#### Age Groups and Premorbid Conditions

Unless otherwise specified, co-morbidities, risk factors of bacterial meningitis and pharmacological immunosuppression were defined as having information within five years before admission of:

- *co-morbidity*, defined as constituents of the Charlson co-morbidity index
- *risk factors of bacterial meningitis*, defined as primary immune deficiency, basilar and compound cranial fractures (information collected from the start of the study in 1964) including facial bones (except the mandibular bone)
- *pharmacological immunosuppression* defined as systemic steroid treatment (ongoing for at least two weeks and reported within one year of admission)

“*Specific immunosuppressive conditions* was defined as both specific Charlson co-morbidities and other immunosuppressive conditions: malignant neoplasia, rheumatic disease, diabetes with end organ damage, renal failure, pharmacological immunosuppression, patients of neonatal age, primary immune deficiency and neurosurgical, premorbid traumatic\* (basilar and compound cranial fractures and parameningeal bleeds) and non-traumatic (ischaemic and haemorrhagic cerebrovascular lesions, benign and malignant neoplastic lesions including tumours of the brain parenchyma, spinal medulla and the enclosing meninges) lesions of the CNS resulting in blood-brain barrier dysfunction(1-8).

\* Hospital classification codes used to identify a premorbid traumatic lesion of the central nervous system

| Traumatic lesion                      | ICD10   | ICD9    | ICD8         |
|---------------------------------------|---------|---------|--------------|
| <i>Traumatic para-meningeal bleed</i> | S064+01 | 852+AB  | 852,00 10 90 |
|                                       | S065+01 |         |              |
|                                       | S066+01 |         |              |
| <i>Compound (open) fracture</i>       | S0271   | 800+CD  | 800,10       |
|                                       | S0281   | 802+FX  | 802,52       |
|                                       | S0291   | 803+CD  | 803,10       |
|                                       |         | 804+CD  | 804,10       |
|                                       | S0221   | 802B    | 802,10       |
|                                       | S0231   | 802H    |              |
|                                       | S0241   | 802F    |              |
| <i>Basilar skull fracture</i>         | S021+01 | 801+A-D |              |

Age was presented as standard age groups; neonates (admitted at age < 29 days postpartum), children (young children 0–4 and 5–17 years of age) and adults (18–64 and the elderly over 65 years of age).

#### Healthcare-associated Bacterial Meningitis

*Healthcare-associated bacterial meningitis (HBM)* was defined in accordance with Durand et al and the Centers for disease control and prevention/National Healthcare Safety Network surveillance criteria from the year 2017 for healthcare-associated infection and meningitis following neurosurgery within 90 days and/or the presence of an indwelling device. The

included surgical procedures together with their hospital codes are specified below. In Sweden, the K6-classification of surgical procedures was used during the years 1963 to 1996 and the KVÅ-classification of surgical procedures was used since the year 1997.

Episodes admitted with a meningitis diagnosis within 90 days of neurosurgery (ICD10-8; T850 T814 998F DA016 JAL50–51 DD006 DD010 DD018 DFE00 GA003 DA002 DA004 998,50 998,45, KVÅ; AA|A–H J–N P U W AB|A–E W AEA AW|A–E W, K6; 01|0–1 3–5 8–9 02|0–4 03|0–5 8–9 2058 06|18–19) without the placement of an indwelling intracranial device and cases related to an indwelling device (*device-related bacterial meningitis, DBM*) including an intracranial shunt (K6:02|20 22 and KVÅ:AAF|05 10 15 40), electrode (K6:02|40 41 42 and KVÅ:AAG20 AAW01 AEA00) or a cochlear implant (K6:2058 and KVÅ:DD|006 010 018 DFE00 GA003) present on admission were classified as *post-neurosurgical bacterial meningitis (PBM)*

Neonatal episodes, that did not fulfill the criteria of PBM, were defined as *facility-acquired bacterial meningitis (HBMF)* at age > 48 h if caused by pathogens other than non-pneumococcal streptococci and at age > 6 days if caused by non-pneumococcal streptococci. For non–neonatal patients that did not fulfill the criteria of PBM, we used bacterial meningitis specific temporal cut-offs for *HBMF*-episodes at > 48 h of admission and < 7 days of discharge.

In addition to a focus of infection\*\* present or incubating at admission, we used a secondary attribution period of 14 days before admission due to bacterial meningitis to differentiate episodes secondary to a community-acquired primary focus of infection from *HBM*-episodes. The difficulty of establishing a route of infection in episodes with penetrating head-trauma followed by neurosurgery has been recognized previously. Therefore, BM-episodes where no temporal relation between BM-onset, trauma and neurosurgery could be established were classified as post-neurosurgical.

\*\* Hospital classification codes used to identify a focus of infection present or incubating at admission:

| Infection focus                  | ICD10     | ICD9      | ICD8         |
|----------------------------------|-----------|-----------|--------------|
| <i>Infective endocarditis</i>    | I330      | 421A      | 421,00       |
|                                  |           | 036E      |              |
| <i>Ear focus</i>                 | H660      | 382A      | 381,00       |
|                                  | H700      | 383A      | 382,00       |
| <i>Sinusitis</i>                 | J010-4    | 461A-D WX | 461,00-04 09 |
|                                  | J019      |           |              |
| <i>Tonsillitis</i>               | J030      | 034A      | 034,00       |
|                                  | J369      | 475       | 501,99       |
| <i>Bacterial lung infections</i> | J139      | 481       | 481,99       |
|                                  | J149      | 482C-E    | 482,10-30    |
|                                  | J152-4    | 507A      | 485,01       |
|                                  | J690      | 510 AX    | 510,01 03 09 |
|                                  | J851      | 513A      | 513,99       |
|                                  | J860      |           |              |
|                                  | J869      |           |              |
| <i>Abscess of the CNS</i>        | G060      | 324ABX    | 322,00 03    |
|                                  | G061 AJKX |           |              |

### **Analysis of ICD-coding practices over time**

To assess changes in the sensitivity of ICD-coding practices over time, we analysed the annual incidence rate of acute cystitis and pyelonephritis in non-pregnant and non-puerperal women and males between 18 and 40 years of age hospitalized with bacterial meningitis without a specified aetiology, meningitis/encephalitis with herpes simplex or meningitis/encephalitis with varicella zoster between in Sweden between 1987 and 2014. This separate cohort was used since the incidence rate of acute cystitis and pyelonephritis over time was expected to be constant. Therefore, any temporal trends in incidence rate over time would suggest changes in coding practices over time. We found no evidence of significant changes in sensitivity of the analysed ICD-codes over time:

| <b>Time period in years</b>                     | <b>n/N:</b> | <b>P-value for annual change#</b> |
|-------------------------------------------------|-------------|-----------------------------------|
| 1987 to 2014 (ICD9 and ICD10 used subsequently) | 40/1219     | 0.106                             |

#Negative binomial regression was used to analyse changes in incidence rate over time

### **Recurrent Bacterial Meningitis**

Episodes that required less than three days (unless death occurred within that time) of hospitalization were excluded to minimize the risk of misclassification. We used a washout-time consisting of the most common recommended therapy-duration (10 days) in Sweden and an additional three weeks in accordance with prior definitions. In addition, new episodes registered less than 30 days from hospital discharge date were excluded to account for late occurring SS relating to the index-episode and to ensure a complete convalescence period between episodes in the same patient

### **Severe sequelae**

Severe sequelae were defined as all-cause mortality within thirty days and severe neurological sequelae within one year (cerebrovascular sequelae restricted to 90 days) after admission that were not present prior to the current hospital admission due to bacterial meningitis:

#### *All-cause mortality*

Deaths < 30 days specified as attributable to bacterial meningitis by a physician (Cause specific mortality)

Deaths < 30 days not specified as attributable to bacterial meningitis by a physician (Non-cause specific mortality)

#### *Severe neurological sequelae*

##### *Structure altering (“Structural”) lesions*

- Haemorrhagic and ischaemic cerebrovascular lesion
- Hydrocephalus

##### *Neurological symptoms*

- Epilepsy
- Paresis of one or more limbs
- Loss of vision and/or other cranial nerve dysfunctions excluding hearing impairment

##### *Hearing loss*

- Sensorineural hearing impairment

##### *Psychological symptoms*

- Depression and anti-depressive pharmacological treatment (*starting July 2005*)
- Moderate and severe anxiety (*starting July 2005*)
- Attention deficit hyperactivity disorder (ADHD)

## Disease Burden

Cases with information on severe neurological sequelae were assigned standard disability weights per the Global Burden of Disease (GBD) 2013 to account for multiple SS. Years lived with disability (YLD) and years of life lost (YLL) were calculated using life span or data on age and gender-specific life expectancy at year of diagnosis from Statistics Sweden. Disease burden constituents were defined in accordance with the GBD as episodes with acute consequences and SS.

Formula for calculation of **disability adjusted life years (DALY)** constituents:

*Years lived with disability (YLD):* n cases x duration until remission or death x DW (disease weight)

*Years of life lost (YLL):* n cases x (national) life expectancy at time of death

Disease weights (DW) and ICD-codes:

### **Episodes**

- *Acute episode, severe:* 0.133
- *Post-acute effects:* 0.219

### **Severe neurological sequelae**

- *Severe structure-altering neurological sequelae*

Stroke, long term consequences, moderate + cognition problems:

0.316\*life expectancy at time of admission

ICD8-10: 321,00 09 430,00-1 08-09 90-91 98-99 431,00-01 08-09 90-91 98-99 432,00-02 08 09 90-92 98-99 433,00 99, 434,00 99 436,00 99 437,00 99 | 325 430 431 432ABX 433+ABCDWX, 434+ABX 437G 671F | G089 I601-3 I610-16 I618-21 I629 I630-36 I638-39 I649 I676 Z867C

Hydrocephalus (moderate motor + cognitive impairment): 0.203\* life expectancy at time of admission ICD8-10: 324,00, 347,93 | 331DE | G910-12, G918+ABW, G919

- *Severe non-structure-altering neurological sequelae*

Epilepsy, severe followed by less severe for the remaining life expectancy

First year: (0.552\*1) + (0.263\* life expectancy at time of admission-1)

ICD8-10: 345,20 345,00 09-11 19 30-33 39 98 99 | 345, 345JKLMNPQWX | G400+ABW G401ABCDE X G402+ABCDEF X G403+ABCDEF X G404+ABCDX G405-9 G418-19

Motor, severe (see below, hemi/paraplegia)

0.402\*life expectancy at time of admission

ICD8-10: 344,00-03 08 09, 342+ABX, 344ABCDEFWX, G810, G811, G819-25, G830-34, G838-39

Motor, moderate (see below, ataxia/coordination)

0.203\* life expectancy at time of admission

ICD8-10: 780,40 49 | 781CD | R260-3, R268, R270, R278

Blindness (see below, uni/bilateral)

0.187\*life expectancy at time of admission

ICD 8-10: 379,09/19/29/39 | 369ABG | H488, H740-7, H532-4, H541-2, H559, H540+H544

Severe vision impairment, (see below, bilateral vision loss)

0.184\*life expectancy at time of admission

ICD 8-10: 781,00/01/02/10/12 377,90 | 368CDE, 369CD, 377BDEWX, 379F | H470-77, H488, H532-34, H541-42, H559

Moderate vision impairment, (see below, unilateral vision loss)

0.031\*life expectancy at time of admission

ICD 8-10: 781,09 | 369H-X | H545-H546, H549

Mild vision impairment, (see below)

0.003\*life expectancy at time of admission

ICD 8-10: 367,00-03+09, 373,00-04+09 | 036W, 368B, 377D, 378A-X | H469, H481, H490-94, H490-506, H508-512, H518-19, H535-36, H538-39

Other cranial nerve dysfunctions (stroke, long term consequences, moderate, see below)

0.070\*life expectancy at time of admission

ICD 8-10: 356,00-05, 356,8-09, 781,50-52, 781,59, 781,60-61, 781,63-64, 781,66 | 350BWX, 351AWX, 352ABCDEF X G, 781B, 782A, 784DFG | G500-001, G508, G510-514, G518-23, G527-29, G531, R200-203, R430-32, R438, R470-71, R478, R480-82, R488

Severe depression

0.658\*life expectancy at time of admission

ICD10: F322-23

Moderate depression

0.396\*life expectancy at time of admission

ICD10: F321

Mild depression

0.145\*life expectancy at time of admission

ICD10: F320, F328-29, F412

Severe anxiety

0.523\*life expectancy at time of admission

ICD10: F410-11

Moderate anxiety

0.133\*life expectancy at time of admission

ICD10: F400, F412-13, F418-19, F930-32

Attention deficit hyperactivity disorder (ADHD)

0.045\* life expectancy at time of admission

ICD10: F900+ABCX

Hearing loss (assumed severe for all expect those with information of a hearing aid which are classified as mild, see below) 0.158\*life expectancy at time of admission

ICD10: H903-8, H912-13, H918-19

With hearing aid: 0.010\*life expectancy at time of admission

ICD10: Z461, AD051, DEE00, DDE00, DFE10, GA004, GA005, GA022

## SUPPLEMENTARY TABLES

**Table S1:** Meningitis-causing bacteria according to Swedish ICD 8, 9 and 10

| <b>Pathogen</b>                                                                | <b>ICD10</b>                                                                                                                                                                                               | <b>ICD9</b>                                                                                                                             | <b>ICD8</b>                        |
|--------------------------------------------------------------------------------|------------------------------------------------------------------------------------------------------------------------------------------------------------------------------------------------------------|-----------------------------------------------------------------------------------------------------------------------------------------|------------------------------------|
| <i>H. influenzae</i>                                                           | G000                                                                                                                                                                                                       | 320A                                                                                                                                    | 320,00                             |
| <i>S. pneumoniae</i>                                                           | G001                                                                                                                                                                                                       | 320B                                                                                                                                    | 320,10                             |
| <i>N. meningitidis</i>                                                         | A390                                                                                                                                                                                                       | 036A                                                                                                                                    | 036,00                             |
| Non-pneumococcal streptococci                                                  | G002                                                                                                                                                                                                       | 320C                                                                                                                                    | 320,80                             |
| Gram-negatives<br>(except <i>H. influenzae</i> and<br><i>N. meningitidis</i> ) | G008A<br>G008B<br>G008W & A022<br>G008W & A010<br>G019 & A022<br>G019 & A010<br>G008W & B965<br>G019 & B965<br>G008W & B964<br>G019 & B964<br>G008W & B966<br>G019 & B966<br>G008W & B968B<br>G019 & B968B | 320W & 041E<br>320W & 041D<br>320W & 003C<br>320W & 002A<br>320H & 002A<br>320W & 041H<br>320H & 041H<br><br>320W & 041G<br>320H & 041G | 320,88 & 038,80<br>320,99 & 038,80 |
| <i>L. monocytogenes</i>                                                        | A321                                                                                                                                                                                                       | 320H & 027A                                                                                                                             | 027,01                             |
| <i>Staphylococcus</i> spp.                                                     | G003                                                                                                                                                                                                       | 320D                                                                                                                                    | 320,88 & 038,10<br>320,99 & 038,10 |

**Table S2. Charlson co-morbidities and primary immunodeficiency according to Swedish ICD 8, 9 and 10**

**A. VASCULAR CO-MORBIDITIES**

| <i>Acute coronary syndrome</i> | ICD 10 | ICD 9    | ICD 8        |
|--------------------------------|--------|----------|--------------|
| Unstable angina pectoris       | I200   | 411B     | 411,00 ,99** |
| Myocardial infarction (MI)     | I21-22 | 410+ABWX | 410,00 ,99   |
| Post MI syndrome               | I241   | 411C     | -            |
| Previous MI                    | I252   | 412      | 412,01 91    |

| <i>Congestive heart failure*</i> | ICD 10         | ICD 9   | ICD 8           |
|----------------------------------|----------------|---------|-----------------|
| CHF                              | I50            | 428+ABX | 427,00 428,99   |
| HT disease w CHF                 | I110 I130 I132 | -       | -               |
| Pulmonary heart disease          | I279           | 416+ABX | 426,01 02 08 09 |
| CHF of the neonate               | P290           | -       | -               |

\* excluding arrhythmia and valvular disorders

| <i>Peripheral vascular disease*</i> | ICD 10 | ICD 9     | ICD 8                 |
|-------------------------------------|--------|-----------|-----------------------|
| Atherosclerosis                     | I70    | 440+A-CWX | 440,00 10 20 38<br>99 |
| Aortic aneurysm/dissection          | I71    | 441+A-H   | 441,00 10 20 99       |
| Non-aortic aneur./dissec.           | I72    | 442+A-DWX | 442,00 10 20 99       |
| Other periph. vasc. disease         | I739B  | 443X      | 443,90                |

\* excluding hypertension

| <i>Cerebrovascular disease</i>            | ICD 10                              | ICD 9                                   | ICD 8                                                       |
|-------------------------------------------|-------------------------------------|-----------------------------------------|-------------------------------------------------------------|
| Haemorrhagic cerebrovascular lesion (CVL) | I60-62                              | 430-431<br>432+ABX                      | 430-431,00 01 08<br>09 90 91 98 99                          |
| Haemorrhagic CVL (neo.)                   | P52                                 | 772B+C                                  | -                                                           |
| Perinatal haemorrh. CVL (neo.)            | P10                                 | 767A                                    | 772,01-03 778,20                                            |
| Ischaemic CVL                             | I63                                 | 433+A-DWX<br>434+ABX                    | 432,00 01 02 08<br>09 90 91 92 98 99<br>433-434,00 99       |
| Cerebrovascular disease (CVD)             | I67<br>I649 (CVL NOS)<br>G459 (TIA) | 437+A-GWX<br>436 (CVL NOS)<br>435 (TIA) | 437-438,00 99<br>436,00 99 (CVL<br>NOS)<br>435,00 ,99 (TIA) |
| Late effects of CVD                       | I69                                 | 438                                     | -                                                           |
| Trombophleb. of venous sini               | G089                                | 325                                     | 321,00 09                                                   |
| Cerebr. ven. thromb. (preg.)              | O225                                | 671F                                    | 674,99 (all CVD)                                            |
| Cerebr. ven. thromb. (puer.)              | O873                                | 674A                                    | 674,99 (all CVD)                                            |

**B. PEPTIC ULCER**

|  | ICD 10 | ICD 9  | ICD 8  |
|--|--------|--------|--------|
|  | K25-27 | 531-34 | 531-34 |

**C. DEMENTIA**

|  | ICD 10                | ICD 9                          | ICD 8      |
|--|-----------------------|--------------------------------|------------|
|  | F00-03, G30,<br>G318A | 290 291C 294B<br>331A-C (+F-H) | 290 292,00 |

#### D. CHRONIC PULMONARY DISEASE

|                                                             | ICD 10    | ICD 9        | ICD 8     |
|-------------------------------------------------------------|-----------|--------------|-----------|
| Emphysema                                                   | J43       | 492          | 492       |
| Chronic obstructive lung disease                            | J44       | 496          | 491,04    |
| Asthma (excluding episodes specified as acute)              | J45 0189  | 493          | 493       |
| Bronchiectasis                                              | J479      | 494          | 518       |
| Pneumoconiosis                                              | J60-65    | 500-503, 505 | 515       |
| Chronic lung disease due to chemicals, gas, smoke or vapour | J684      | 506E         | 516       |
| Interstitial lung disease                                   | J703, J84 | 515-516      | 517       |
| Primary pulmonary hypertension                              | I270      | 416A         | 426,02    |
| Cystic fibrosis                                             | E84       | 277A         | 273,00    |
| Congenital conditions of the lung                           | Q33       | 748 EFGW     | 748       |
| Chronic perinatal respiratory disorders                     | P27       | 770H         | 776,60 70 |

#### E. RHEUMATIC DISEASE AND ASSOCIATED CHRONIC AUTOIMMUNE CONDITIONS (PSORIASIS, INFLAMMATORY BOWEL DISEASE AND PYODERMA GANGRAENOSUM)

|                                     | ICD 10      | ICD 9         | ICD 8           |
|-------------------------------------|-------------|---------------|-----------------|
| Rheumatoid arthritis                | M05-06      | 714           | 712             |
| Psoriasis                           | M07 L40     | 694D 696AB    | 696, 00-29+98   |
| Juvenile arthritis                  | M08-09      | (714D, above) | (712,00, above) |
| Vasculitis and polyarthritis        | M30-31 D891 | 446 273C      | 446 275,40      |
| Systemic lupus erythematosus        | M32         | 710A 695E     | 734,10 695,40   |
| Polymyositis and dermatomyositis    | M33         | 710DE         | 716             |
| Systemic scleroderma                | M34         | 710B          | 734,00-09       |
| Other autoimmune systemic disorders | M35         | 710CWX        | 734,90-99       |
| Morbus Bechterew                    | M45         | 720A          | 712,40          |
| Pyoderma gangraenosum               | L889        | -             | -               |
| Morbus Crohn                        | K50         | 555           | 563,00          |
| Ulcerous colitis                    | K51 0234589 | 556           | 563,10          |

#### F. MILD LIVER DISEASE

|                                                                                                      | ICD 10       | ICD 9   | ICD 8               |
|------------------------------------------------------------------------------------------------------|--------------|---------|---------------------|
| <i>Without indication of cirrhosis/fibrosis/failure/infarction/coma or varices of the oesophagus</i> |              |         |                     |
| Viral hepatitis                                                                                      | B16 19 B17 0 | 070 DFX | 070,02-03<br>999,20 |



|                                                       |                                                                                   |                    |        |
|-------------------------------------------------------|-----------------------------------------------------------------------------------|--------------------|--------|
|                                                       | B18 0+A-D+HWX<br>B18 1+A-D+HWX<br>B18 2+A-D+HWX<br>B18 8<br>B18 9+A-D+HWX<br>B199 |                    |        |
| Liver disease related to the consumption of ethanol   | K70 019                                                                           | 571ABD             | -      |
| Toxic liver disease                                   | K71 02345689                                                                      | 573D               | -      |
| Chronic hepatitis NOS                                 | K73                                                                               | 571E               | -      |
| Other inflammatory hepatitis and abscess of the liver | K75 048                                                                           | 572AB              | 572,99 |
| Other conditions of the liver                         | K76 0189<br>K77<br>Q446                                                           | 571 WX<br>573ABCWX | 573,01 |

#### G. DIABETES MELLITUS\*

| <i>Without indication of end organ damage</i> | ICD 10     | ICD 9                           | ICD 8                           |
|-----------------------------------------------|------------|---------------------------------|---------------------------------|
| Type 1, no complications indicated            | E109 E106A | 250A                            | 250,00 09                       |
| type 1 with coma                              | E100       | 250C                            | 250,07                          |
| type 1 with ketoacidosis                      | E101       | 250B                            | -                               |
| Type 2, no complications indicated            | E119 E116A | - (type not specified in ICD 9) | - (type not specified in ICD 8) |
| type 2 with coma                              | E110       | -                               | -                               |
| type 2 with ketoacidosis                      | E111       | -                               | -                               |

\* Not including codes for diabetes mellitus during pregnancy

#### H. DIABETES MELLITUS WITH END ORGAN DAMAGE

| <i>With indication of end organ damage</i> | ICD 10                                                                         | ICD 9                           | ICD 8                           |
|--------------------------------------------|--------------------------------------------------------------------------------|---------------------------------|---------------------------------|
| Type 1, with complications                 | E102-8 (except E106A)                                                          | 250 D-X<br>357C                 | 250,01-06 08                    |
| Type 2, with complications                 | E112-8 (except E116A)<br><br>H280 H360<br>G590 G632<br>M142<br>M908FGH<br>N083 | - (type not specified in ICD 9) | - (type not specified in ICD 8) |

#### I. HEMI AND PARAPLEGIA

|                      | ICD 10 | ICD 9           | ICD 8                  |
|----------------------|--------|-----------------|------------------------|
| Hemi- and paraplegia | G81-82 | 342-43<br>344AB | 343,00 02<br>344,00-01 |

J. MODERATE OR SEVERE RENAL DISEASE

|  | ICD 10  | ICD 9        | ICD 8      |
|--|---------|--------------|------------|
|  | N18 3-9 | 585<br>403-4 | 582<br>792 |

K. MODERATE OR SEVERE LIVER DISEASE

| <i>With indication of cirrhosis/fibrosis/failure/infarction/coma or varices of the oesophagus</i> | ICD 10                                                                 | ICD 9                     | ICD 8            |
|---------------------------------------------------------------------------------------------------|------------------------------------------------------------------------|---------------------------|------------------|
| Viral hepatitis                                                                                   | B150<br>B16 02<br>B18 0EFG<br>B18 1EFG<br>B18 2EFG<br>B18 9EFG<br>B190 | 070 ACEG                  | -                |
| Liver disease related to the consumption of ethanol                                               | K70 234                                                                | 571C                      | 571,00-01        |
| Toxic liver disease                                                                               | K71 17                                                                 | -                         | -                |
| Liver failure                                                                                     | K72                                                                    | -                         | -                |
| Fibrosis, cirrhosis and sclerosis of the liver                                                    | K74                                                                    | 571 FG                    | 571,90-99        |
| Thrombosis of liver veins                                                                         | I819 I820 I823                                                         | 452 453A                  | 452,99           |
| Other conditions of the liver and signs of liver failure                                          | K76 234567<br>I98 23                                                   | 572CDEW<br>573E<br>456ABC | 573,02<br>456,00 |

L. LYMPHOMA AND PRIMARY IMMUNE DEFICIENCY; MONOCLONAL GAMMOPATHY OF UNKNOWN SIGNIFICANCE (MGUS)

|          | ICD 10 | ICD 9   | ICD 8   |
|----------|--------|---------|---------|
| Lymphoma | C81-86 | 200-202 | 200-202 |
| MGUS     | D472   | 273B    | -       |

M. LEUKEMIA, MALIGN PLASMA CELL NEOPLASIA AND ASSOCIATED CONDITIONS OF IMMUNOSUPPRESSION (MYELOFIBROSIS, MYELODYSPLASTIC SYNDROME AND PRIMARY IMMUNE DEFICIENCIES EXCLUDING MGUS)

|                              | ICD 10  | ICD 9    | ICD 8   |
|------------------------------|---------|----------|---------|
| Leukaemia                    | C91-95  | 204-208  | 204-207 |
| Myelodysplastic syndrome     | D46 679 | -        | -       |
| Myelofibrosis                | D474    | 289W     | 209,99  |
| Malign plasma cell neoplasia | C90     | 203 238G | 203     |

|                                                 |                                        |                          |                          |
|-------------------------------------------------|----------------------------------------|--------------------------|--------------------------|
| (excluding lymphoplasmacytic lymphoma and MGUS) |                                        |                          |                          |
| Humoral deficiencies                            | D80 (excl. D802)                       | 279J                     | 270 00 10                |
| Severe combined immunodeficiency (SCID)         | D81                                    | (not specified in ICD 9) | (not specified in ICD 8) |
| Common variable immunodeficiency (CVID)         | D83                                    | (not specified in ICD 9) | (not specified in ICD 8) |
| Complement deficiencies                         | D841                                   | 279W                     | (not specified in ICD 8) |
| Other primary immune deficiencies               | D82 (excl. D824AB)<br>D84 0 89<br>G113 | 279LMX<br>334W           | 759,86                   |

#### N. METASTATIC SOLID TUMOUR

|  | ICD 10                       | ICD 9                   | ICD 8                                  |
|--|------------------------------|-------------------------|----------------------------------------|
|  | C77-78<br>C79<br>0123*456789 | 196-97<br>198ABCD*EFGHW | 196-97<br>198 01 18 21 31*<br>48 51 98 |

\* Metastasis to the central nervous system (CNS) is scored as 6 points when calculating the Charlson co-morbidity index but categorized as a lesion of the CNS

#### O. ANY (OTHER) TUMOUR

|                                                                                                                                                             | ICD 10                                                       | ICD 9                                 | ICD 8                                    |
|-------------------------------------------------------------------------------------------------------------------------------------------------------------|--------------------------------------------------------------|---------------------------------------|------------------------------------------|
| Malign tumours, excluding the central nervous system (CNS) and the meninges                                                                                 | C00-69<br>C72 12345<br>C73-75<br>C97                         | 140-190<br>192AWX<br>193-95           | 140-190<br>192 10 21 31<br>193-95        |
| Benign or malign brain parenchymal/medullar spinal cord tumour or tumour of unspecified location within the CNS (excluding specified cranial nerve tumours) | C71<br>C72 089<br>C793*<br>D33 012479<br>D43 012479<br>Z858F | 191<br>192C<br>198D*<br>225AD<br>237F | 191<br>192,10 21<br>198,31*<br>225 00 30 |
| Benign or malign meningeal tumour                                                                                                                           | C70<br>D32<br>D42                                            | 192BD<br>225CE<br>237G                | 192,31<br>225 20 40                      |

\* Metastasis to the central nervous system (CNS) is scored as 6 points when calculating the Charlson co-morbidity index but categorized as a lesion of the CNS

#### P. HIV/AIDS

|  | ICD 10         | ICD 9          | ICD 8 |
|--|----------------|----------------|-------|
|  | B20-24<br>Z219 | 279K 079J V02J | -     |

**Table S3. Data validation of register data against medical records from consecutive episodes of bacterial meningitis (n=46\*).**

| <i>Variable</i>                                     | <i>Level of agreement (n/N)</i> |
|-----------------------------------------------------|---------------------------------|
| Bacterial meningitis                                | 46/46                           |
| Pathogen                                            | 46/46                           |
| Single or recurrent episode of bacterial meningitis | 46/46                           |
| Age                                                 | 46/46                           |
| Gender                                              | 46/46                           |
| Clinical setting                                    | 43/46†                          |
| Charlson co-morbidity (20 variables)                | 43/46 (917/920 data entries) ‡  |
| Specific immunosuppression (6 variables)            | 45/46 (275/276 data entries) §  |
| Severe sequelae (4 variables)                       | 46/46 (184/184 data entries)    |

\* 46 medical records of consecutive episodes of bacterial meningitis from Swedish secondary and tertiary care hospitals during the years 2005 to 2014 were retrieved with one year of follow up data from hospital admittance † one episode with register information of admittance from a nursing home that was not noted as such in the medical records and two episodes with register information of being hospital-acquired that were registered in the medical records as community-acquired ‡ Information of hepatitis C in the medical records not registered as an ICD-code for > 5 years, information of diabetes mellitus without complications in the medical records not registered as an ICD-code for > 5 years and malignant neoplasia as an ICD-code entry that was not registered in the medical records during the hospital stay for bacterial meningitis § one episode of a patient with registry entries of both parenchymal and meningeal tumour of the central nervous system that had information of recurrent meningeal tumours in the medical records but no information of a parenchymal tumour

**Table S4. Gram-negative Episodes per Pathogen and Clinical Setting, Sweden 1965–2014. *Neisseria meningitidis* and *Haemophilus influenzae* are excluded.**

| <b>Pathogen<br/>n (%)</b>           | <b>Community-<br/>acquired<br/>n (%)</b> | <b>Healthcare<br/>facility-acquired<br/>n (%)</b> | <b>Post-<br/>neurosurgical,<br/>no indwelling<br/>device present<br/>n (%)</b> | <b>Post-<br/>neurosurgical,<br/>indwelling<br/>device present<br/>n (%)</b> |
|-------------------------------------|------------------------------------------|---------------------------------------------------|--------------------------------------------------------------------------------|-----------------------------------------------------------------------------|
| <b>Adults (n=90)</b>                | <b>n=44</b>                              | <b>n=27</b>                                       | <b>n=11</b>                                                                    | <b>n=8</b>                                                                  |
| <i>Escherichia coli</i> 53 (59)     | 28 (64)                                  | 16 (59)                                           | 5 (45)                                                                         | 4 (50)                                                                      |
| <i>Klebsiella</i> spp. 20 (22)      | 8 (18)                                   | 5 (19)                                            | 3 (27)                                                                         | 4 (50)                                                                      |
| <i>Salmonella</i> spp. 3 (3)        | 2 (5)                                    | 1 (4)                                             | 0 (0)                                                                          | 0 (0)                                                                       |
| <i>Pseudomonas</i> spp. 12 (13)     | 5 (11)                                   | 4 (15)                                            | 3 (27)                                                                         | 0 (0)                                                                       |
| <i>Proteus</i> spp. 2 (2)           | 1 (2)                                    | 1 (4)                                             | 0 (0)                                                                          | 0 (0)                                                                       |
| <b>Non-neonatal Children (n=22)</b> | <b>n=13</b>                              | <b>n=2</b>                                        | <b>n=2</b>                                                                     | <b>n=5</b>                                                                  |
| <i>Escherichia coli</i> 18 (82)     | 12 (92)                                  | 1 (50)                                            | 1 (50)                                                                         | 4 (80)                                                                      |
| <i>Klebsiella</i> spp. 1 (5)        | 0 (0)                                    | 0 (0)                                             | 0 (0)                                                                          | 1 (20)                                                                      |
| <i>Salmonella</i> spp. 1 (5)        | 0 (0)                                    | 1 (50)                                            | 0 (0)                                                                          | 0 (0)                                                                       |
| <i>Pseudomonas</i> spp. 2 (9)       | 1 (8)                                    | 0 (0)                                             | 1 (50)                                                                         | 0 (0)                                                                       |
| <i>Proteus</i> spp. 0 (0)           | 0 (0)                                    | 0 (0)                                             | 0 (0)                                                                          | 0 (0)                                                                       |
| <b>Neonates (n=34)</b>              | <b>n=10</b>                              | <b>n=24</b>                                       | <b>n=0</b>                                                                     | <b>n=0</b>                                                                  |
| <i>Escherichia coli</i> 28 (82)     | 6 (60)                                   | 22 (92)                                           | 0 (0)                                                                          | 0 (0)                                                                       |
| <i>Klebsiella</i> spp. 4 (12)       | 4 (40)                                   | 0 (0)                                             | 0 (0)                                                                          | 0 (0)                                                                       |
| <i>Salmonella</i> spp. 1 (3)        | 0 (0)                                    | 1 (4)                                             | 0 (0)                                                                          | 0 (0)                                                                       |

|                               |       |       |       |       |
|-------------------------------|-------|-------|-------|-------|
| <i>Pseudomonas</i> spp. 0 (0) | 0 (0) | 0 (0) | 0 (0) | 0 (0) |
| <i>Proteus</i> spp. 1 (3)     | 0 (0) | 1 (4) | 0 (0) | 0 (0) |

**Table S5. Episodes per Pathogen and Clinical Setting in the Post-pneumococcal Vaccine Era, Sweden 2009–2014**

| Pathogen<br>n (%)                    | Community-<br>acquired<br>n (%) | Healthcare<br>facility-acquired<br>n (%) | Post-<br>neurosurgical,<br>no indwelling<br>device present<br>n (%) | Post-<br>neurosurgical,<br>indwelling<br>device present<br>n (%) |
|--------------------------------------|---------------------------------|------------------------------------------|---------------------------------------------------------------------|------------------------------------------------------------------|
| <b>Adults (n=1041)</b>               | <b>n=719</b>                    | <b>n=201</b>                             | <b>n=95</b>                                                         | <b>n=26</b>                                                      |
| <i>H. influenzae</i> 51 (5)          | 41 (6)                          | 6 (3)                                    | 3 (3)                                                               | 1 (4)                                                            |
| <i>S. pneumoniae</i> 487 (47)        | 388 (54)                        | 66 (33)                                  | 31 (33)                                                             | 2 (8)                                                            |
| <i>N. meningitidis</i> 109 (10)      | 88 (12)                         | 15 (7)                                   | 5 (5)                                                               | 1 (4)                                                            |
| Streptococci* 106 (10)               | 61 (8)                          | 33 (16)                                  | 8 (8)                                                               | 4 (15)                                                           |
| Gram-negatives 42 (4)                | 19 (3)                          | 12 (6)                                   | 5 (5)                                                               | 6 (23)                                                           |
| <i>L. monocytogenes</i> 82 (8)       | 49 (7)                          | 31 (15)                                  | 1 (1)                                                               | 1 (4)                                                            |
| <i>Staphylococcus</i> spp. 160 (15)  | 71 (10)                         | 36 (18)                                  | 42 (44)                                                             | 11 (42)                                                          |
| Polymicrobial 4 (0)                  | 2 (0)                           | 2 (1)                                    | 0 (0)                                                               | 0 (0)                                                            |
| <b>Non-neonatal Children (n=204)</b> | <b>n=140</b>                    | <b>n=42</b>                              | <b>n=10</b>                                                         | <b>n=12</b>                                                      |
| <i>H. influenzae</i> 12 (6)          | 8 (6)                           | 3 (7)                                    | 1 (10)                                                              | 0 (0)                                                            |
| <i>S. pneumoniae</i> 63 (31)         | 48 (34)                         | 15 (36)                                  | 0 (0)                                                               | 0 (0)                                                            |
| <i>N. meningitidis</i> 71 (35)       | 60 (43)                         | 10 (24)                                  | 1 (10)                                                              | 0 (0)                                                            |
| Streptococci* 27 (13)                | 14 (10)                         | 10 (24)                                  | 2 (20)                                                              | 1 (8)                                                            |
| Gram-negatives 11 (5)                | 5 (4)                           | 2 (5)                                    | 1 (10)                                                              | 3 (25)                                                           |
| <i>L. monocytogenes</i> 2 (1)        | 1 (1)                           | 1 (2)                                    | 0 (0)                                                               | 0 (0)                                                            |
| <i>Staphylococcus</i> spp. 18 (9)    | 4 (3)                           | 1 (2)                                    | 5 (50)                                                              | 8 (67)                                                           |
| Polymicrobial 0 (0)                  | 0 (0)                           | 0 (0)                                    | 0 (0)                                                               | 0 (0)                                                            |
| <b>Neonates (n=77)</b>               | <b>n=25</b>                     | <b>n=51</b>                              | <b>n=0</b>                                                          | <b>n=1</b>                                                       |
| <i>H. influenzae</i> 1 (1)           | 0 (0)                           | 1 (2)                                    | 0 (0)                                                               | 0 (0)                                                            |
| <i>S. pneumoniae</i> 0 (0)           | 0 (0)                           | 0 (0)                                    | 0 (0)                                                               | 0 (0)                                                            |
| <i>N. meningitidis</i> 0 (0)         | 0 (0)                           | 0 (0)                                    | 0 (0)                                                               | 0 (0)                                                            |
| Streptococci* 52 (68)                | 16 (64)                         | 36 (71)                                  | 0 (0)                                                               | 0 (0)                                                            |
| Gram-negatives 19 (25)               | 7 (28)                          | 12 (24)                                  | 0 (0)                                                               | 0 (0)                                                            |
| <i>L. monocytogenes</i> 1 (1)        | 0 (0)                           | 1 (2)                                    | 0 (0)                                                               | 0 (0)                                                            |
| <i>Staphylococcus</i> spp. 4 (5)     | 2 (8)                           | 1 (2)                                    | 0 (0)                                                               | 1 (100)                                                          |
| Polymicrobial 0 (0)                  | 0 (0)                           | 0 (0)                                    | 0 (0)                                                               | 0 (0)                                                            |

\* Non-pneumococcal streptococci

**Table S6. Recurrent Episodes\* per Pathogen and Clinical Setting, Sweden 1965–2014**

| <b>Pathogen<br/>n (%)</b>            | <b>Community-<br/>acquired<br/>n (%)</b> | <b>Healthcare<br/>facility-acquired<br/>n (%)</b> | <b>Post-<br/>neurosurgical,<br/>no indwelling<br/>device present<br/>n (%)</b> | <b>Post-<br/>neurosurgical,<br/>indwelling<br/>device present<br/>n (%)</b> |
|--------------------------------------|------------------------------------------|---------------------------------------------------|--------------------------------------------------------------------------------|-----------------------------------------------------------------------------|
| <b>Adults (n=395)</b>                | <b>n=322</b>                             | <b>n=32</b>                                       | <b>n=19</b>                                                                    | <b>n=22</b>                                                                 |
| <i>H. influenzae</i> 58 (15)         | 47 (15)                                  | 4 (12)                                            | 4 (21)                                                                         | 3 (14)                                                                      |
| <i>S. pneumoniae</i> 254 (64)        | 221 (69)                                 | 19 (59)                                           | 5 (26)                                                                         | 9 (41)                                                                      |
| <i>N. meningitidis</i> 12 (3)        | 11 (3)                                   | 0 (0)                                             | 1 (5)                                                                          | 0 (0)                                                                       |
| Streptococci† 25 (6)                 | 16 (5)                                   | 3 (9)                                             | 2 (11)                                                                         | 4 (18)                                                                      |
| Gram-negatives 3 (1)                 | 1 (0)                                    | 1 (3)                                             | 1 (5)                                                                          | 0 (0)                                                                       |
| <i>L. monocytogenes</i> 6 (2)        | 5 (2)                                    | 1 (3)                                             | 0 (0)                                                                          | 0 (0)                                                                       |
| <i>Staphylococcus</i> spp. 28 (7)    | 12 (4)                                   | 4 (12)                                            | 6 (32)                                                                         | 6 (27)                                                                      |
| Polymicrobial 9 (2)                  | 9 (3)                                    | 0 (0)                                             | 0 (0)                                                                          | 0 (0)                                                                       |
| <b>Non-neonatal Children (n=266)</b> | <b>n=223</b>                             | <b>n=17</b>                                       | <b>n=8</b>                                                                     | <b>n=18</b>                                                                 |
| <i>H. influenzae</i> 48 (18)         | 41 (18)                                  | 4 (24)                                            | 1 (12)                                                                         | 2 (11)                                                                      |
| <i>S. pneumoniae</i> 126 (47)        | 115 (52)                                 | 7 (41)                                            | 1 (12)                                                                         | 3 (17)                                                                      |
| <i>N. meningitidis</i> 13 (5)        | 12 (5)                                   | 1 (6)                                             | 0 (0)                                                                          | 0 (0)                                                                       |
| Streptococci† 52 (20)                | 43 (19)                                  | 5 (29)                                            | 3 (38)                                                                         | 1 (6)                                                                       |
| Gram-negatives 5 (2)                 | 1 (0)                                    | 0 (0)                                             | 0 (0)                                                                          | 4 (22)                                                                      |
| <i>L. monocytogenes</i> 6 (2)        | 3 (1)                                    | 0 (0)                                             | 2 (25)                                                                         | 1 (6)                                                                       |
| <i>Staphylococcus</i> spp. 14 (4)    | 6 (3)                                    | 0 (0)                                             | 1 (12)                                                                         | 7 (39)                                                                      |
| Polymicrobial 2 (1)                  | 2 (1)                                    | 0 (0)                                             | 0 (0)                                                                          | 0 (0)                                                                       |
| <b>Neonates (n=9)</b>                | <b>n=2</b>                               | <b>n=7</b>                                        | <b>n=0</b>                                                                     | <b>n=0</b>                                                                  |
| <i>H. influenzae</i> 1 (11)          | 1 (50)                                   | 0 (0)                                             | 0 (0)                                                                          | 0 (0)                                                                       |
| <i>S. pneumoniae</i> 1 (11)          | 0 (0)                                    | 1 (14)                                            | 0 (0)                                                                          | 0 (0)                                                                       |
| <i>N. meningitidis</i> 0 (0)         | 0 (0)                                    | 0 (0)                                             | 0 (0)                                                                          | 0 (0)                                                                       |
| Streptococci† 6 (67)                 | 1 (50)                                   | 5 (71)                                            | 0 (0)                                                                          | 0 (0)                                                                       |
| Gram-negatives 1 (11)                | 0 (0)                                    | 1 (14)                                            | 0 (0)                                                                          | 0 (0)                                                                       |
| <i>L. monocytogenes</i> 0 (0)        | 0 (0)                                    | 0 (0)                                             | 0 (0)                                                                          | 0 (0)                                                                       |
| <i>Staphylococcus</i> spp. 0 (0)     | 0 (0)                                    | 0 (0)                                             | 0 (0)                                                                          | 0 (0)                                                                       |
| Polymicrobial 0 (0)                  | 0 (0)                                    | 0 (0)                                             | 0 (0)                                                                          | 0 (0)                                                                       |

\* In total, 670 episodes occurred in patients with recurrent bacterial meningitis and 406 were recurrent episodes following an initial episode † Non-pneumococcal streptococci

**Table S7. Univariate Covariate Association of Specific Immunosuppressive Conditions with Recurrent Episodes, Sweden 1997–2014\***

Several deficiencies were not specified in ICD9 (that was used before the year 1997), for example common variable immunodeficiency (CVID). To further minimize potential bias due to different versions of the International Classification of Diseases (ICD), the analysis was restricted to the period after introduction of ICD10 in the year 1997.

| <b>Specific immunosuppressive condition (n/N)</b>              | <b>Crude RR† (95 % CI)</b> | <b>P value</b>   |
|----------------------------------------------------------------|----------------------------|------------------|
| <i>Lesions of the central nervous system (65/575)</i>          | 2,7 (1,9–4,0)              | <b>&lt;0,001</b> |
| <i>Post-neurosurgical episode (41/338)</i>                     | 2,5 (1,6–3,8)              | <b>&lt;0,001</b> |
| No indwelling device present (20/240)                          | 1,6 (0,9–2,8)              | 0,09             |
| <i>Indwelling device present (21/98)</i>                       | 3,9 (2,1–7,0)              | <b>&lt;0,001</b> |
| Intracranial shunt present (16/90)                             | 3,1 (1,5–6,4)              | <b>0,002</b>     |
| Cochlear implant present (6/8)                                 | 12,8 (6,8–24,1)            | <b>&lt;0,001</b> |
| Intracranial electrode present (0/1)                           | ‡                          | ‡                |
| <i>Traumatic lesion (14/94)</i>                                | 2,5 (1,2–5,3)              | <b>0,01</b>      |
| Traumatic para-meningeal bleed (6/53)                          | 2,2 (0,7–6,3)              | 0,16             |
| Basilar skull fracture (12/54)                                 | 3,7 (1,7–8,0)              | <b>0,001</b>     |
| Open cranial fracture (2/14)                                   | 1,6 (0,3–9,6)              | 0,60             |
| <i>Neoplastic lesion, not specified as metastasis (11/108)</i> | 2,1 (1,0–4,5)              | <b>0,05</b>      |
| Parenchymal benign and malignant tumour (7/95)                 | 1,5 (0,6–4,1)              | 0,41             |
| Meningeal benign and malignant tumour (5/30)                   | 3,8 (1,5–9,7)              | <b>0,005</b>     |
| <i>Cerebrovascular lesion (18/244)</i>                         | 1,6 (0,9–2,9)              | 0,14             |
| Ischemic (14/124)                                              | 3,5 (1,8–6,7)              | <b>&lt;0,001</b> |
| Haemorrhagic (8/149)                                           | 0,9 (0,3–2,5)              | 0,9              |
| <i>Malignant neoplasia (28/432)</i>                            | 2,5 (1,4–4,2)              | <b>0,001</b>     |
| <i>Haematological malignancy (12/157)</i>                      | 3,2 (1,4–7,1)              | <b>0,004</b>     |
| Lymphoma (6/43)                                                | 4,6 (1,6–13,4)             | <b>0,004</b>     |
| Leukaemia (5/68)                                               | 2,8 (0,9–8,9)              | 0,07             |
| Malignant plasma cell neoplasia (2/58)                         | 2,0 (0,3–12,8)             | 0,48             |
| Other malignant neoplasia (27/382)                             | 2,5 (1,5–4,4)              | <b>0,001</b>     |
| <i>Pharmacological immunosuppression§</i>                      |                            |                  |
| Steroid pre-treatment (8/146)                                  | 1,7 (0,8–3,8)              | 0,17             |
| <i>Other Charlson Co-morbidity (18/311)</i>                    | 1,7 (0,9–3,5)              | 0,1              |
| Rheumatic disease (8/155)                                      | 1,3 (0,5–3,6)              | 0,64             |
| Diabetes mellitus with end organ damage (3/104)                | 0,8 (0,2–3,4)              | 0,7              |
| Moderate to severe liver disease (5/41)                        | 4,6 (1,4–14,7)             | <b>0,01</b>      |
| Renal failure (2/41)                                           | 2,8 (0,5–17,2)             | 0,27             |
| <i>Primary immune deficiency (14/35)</i>                       | 12,5 (7,2–21,7)            | <b>&lt;0,001</b> |

|                                                      |                  |                  |
|------------------------------------------------------|------------------|------------------|
| Common variable immunodeficiency (0/1)               | ‡                | ‡                |
| Severe combined immunodeficiency (0/0)               | ‡                | ‡                |
| Humoral deficiencies (3/7)                           | 10,3 (5,1–20,6)  | <b>&lt;0,001</b> |
| Complement deficiencies (4/6)                        | 13,7 (4,9–38,0)  | <b>&lt;0,001</b> |
| Monoclonal gammopathy of unknown significance (5/19) | 9,4 (3,3–26,7)   | <b>&lt;0,001</b> |
| Other primary immune deficiencies (2/4)              | 16,6 (2,5–110,7) | <b>0,004</b>     |

\* Neonates were excluded from the analysis † Relative risk for recurrent episodes as estimated with logistic regression clustered on patients and adjusted for calendar time and follow-up time ‡ Too few episodes with the current outcome § Pharmacological data available from July 2005, thus estimates are based on the number of episodes from the year 2005 to the year 2014



**Table S8. Severe Sequelae per Pathogen and Clinical Setting in Single-episode Bacterial Meningitis, Sweden 2005–2014**

Pharmacological data was available from the year 2005; therefore, data on severe sequelae was restricted to episodes reported from the year 2005 to the year 2014.

| <b>Pathogen<br/>n/N (%)</b>                | <b>Adults<br/>n/N (%)</b> | <b>Non-<br/>neonatal<br/>Children<br/>n/N (%)</b> | <b>Neonates<br/>n/N (%)</b> | <b>Non-<br/>neuro-<br/>surgical<br/>n/N (%)</b> | <b>Post-<br/>neuro-<br/>surgical<br/>n/N (%)</b> |
|--------------------------------------------|---------------------------|---------------------------------------------------|-----------------------------|-------------------------------------------------|--------------------------------------------------|
| <b><i>All cause 30-day mortality</i></b>   |                           |                                                   |                             |                                                 |                                                  |
| <i>H. influenzae</i> 5/111 (5)             | 5/8 (6)                   | 0/24 (0)                                          | 0/1 (0)                     | 4/108 (4)                                       | 1/3 (33)                                         |
| <i>S. pneumoniae</i> 101/905 (11)          | 93/744 (12)               | 8/160 (5)                                         | 0/1 (0)                     | 96/869 (11)                                     | 5/36 (14)                                        |
| <i>N. meningitidis</i> 14/286 (5)          | 12/167 (7)                | 2/119 (2)                                         | 0/0 (0)                     | 13/279 (5)                                      | 1/7 (14)                                         |
| Streptococci* 21/281 (7)                   | 17/174 (10)               | 1/40 (2)                                          | 3/67 (4)                    | 21/263 (8)                                      | 0/18 (0)                                         |
| Gram-negatives 7/82 (9)                    | 5/50 (10)                 | 0/9 (0)                                           | 2/23 (9)                    | 6/68 (9)                                        | 1/14 (7)                                         |
| <i>L. monocytogenes</i> 26/122 (21)        | 26/119 (22)               | 0/2 (0)                                           | 0/1 (0)                     | 26/120 (22)                                     | 0/2 (0)                                          |
| Staphylococci† 30/287 (10)                 | 30/254 (12)               | 0/29 (0)                                          | 0/4 (0)                     | 28/184 (15)                                     | 2/103 (2)                                        |
| Polymicrobial 1/10 (10)                    | 1/8 (12)                  | 0/2 (0)                                           | 0/0 (0)                     | 1/10 (10)                                       | 0/0 (0)                                          |
| BM‡ 205/2084 (10)                          | 189/1602<br>(12)          | 11/385 (3)                                        | 5/97 (5)                    | 195/1901 (10)                                   | 10/183 (5)                                       |
| <b><i>Severe neurological sequelae</i></b> |                           |                                                   |                             |                                                 |                                                  |
| <i>H. influenzae</i> 30/111 (27)           | 27/86 (31)                | 3/24 (12)                                         | 0/1 (0)                     | 28/108 (26)                                     | 2/3 (67)                                         |
| <i>S. pneumoniae</i> 343/905 (38)          | 309/744 (42)              | 34/160 (21)                                       | 0/1 (0)                     | 320/869 (37)                                    | 23/36 (64)                                       |
| <i>N. meningitidis</i> 62/286 (22)         | 46/167 (28)               | 16/119 (13)                                       | 0/0 (0)                     | 57/279 (20)                                     | 5/7 (71)                                         |
| Streptococci* 92/281 (33)                  | 62/174 (36)               | 14/40 (35)                                        | 16/67 (24)                  | 83/263 (32)                                     | 9/18 (50)                                        |
| Gram-negatives 29/82 (35)                  | 21/50 (42)                | 4/9 (44)                                          | 4/23 (17)                   | 23/68 (34)                                      | 6/14 (43)                                        |
| <i>L. monocytogenes</i> 33/122 (27)        | 33/119 (28)               | 0/2 (0)                                           | 0/1 (0)                     | 31/120 (26)                                     | 2/2 (100)                                        |
| Staphylococci† 153/287 (53)                | 130/254 (51)              | 21/29 (72)                                        | 2/4 (50)                    | 84/184 (46)                                     | 69/103 (67)                                      |
| Polymicrobial 4/10 (40)                    | 4/8 (50)                  | 0/2 (0)                                           | 0/0 (0)                     | 4/10 (40)                                       | 0/0 (0)                                          |
| BM‡ 746/2084 (36)                          | 632/1602<br>(39)          | 92/385 (24)                                       | 22/97 (23)                  | 630/1901 (33)                                   | 116/183 (63)                                     |
| <b><i>Severe sequelae</i></b>              |                           |                                                   |                             |                                                 |                                                  |
| <i>H. influenzae</i> 34/111 (31)           | 31/86 (36)                | 3/24 (12)                                         | 0/1 (0)                     | 32/108 (30)                                     | 2/3 (67)                                         |
| <i>S. pneumoniae</i> 425/905 (47)          | 383/744 (51)              | 42/160 (26)                                       | 0/1 (0)                     | 398/869 (46)                                    | 27/36 (75)                                       |
| <i>N. meningitidis</i> 75/286 (26)         | 57/167 (34)               | 18/119 (15)                                       | 0/0 (0)                     | 69/279 (25)                                     | 6/7 (86)                                         |
| Streptococci* 109/281 (39)                 | 76/174 (44)               | 15/40 (38)                                        | 18/67 (27)                  | 100/263 (38)                                    | 9/18 (50)                                        |
| Gram-negatives 36/82 (44)                  | 26/50 (52)                | 4/9 (44)                                          | 6/23 (26)                   | 29/68 (43)                                      | 7/14 (50)                                        |
| <i>L. monocytogenes</i> 54/122 (44)        | 54/119 (45)               | 0/2 (0)                                           | 0/1 (0)                     | 52/120 (43)                                     | 2/2 (100)                                        |
| Staphylococci† 179/287 (62)                | 156/254 (61)              | 21/29 (72)                                        | 2/4 (50)                    | 109/184 (59)                                    | 70/103 (68)                                      |
| Polymicrobial 5/10 (50)                    | 5/8 (62)                  | 0/2 (0)                                           | 0/0 (0)                     | 5/10 (50)                                       | 0/0 (0)                                          |

|                   |               |              |            |               |              |
|-------------------|---------------|--------------|------------|---------------|--------------|
| BM‡ 917/2084 (44) | 788/1602 (49) | 103/385 (27) | 26/97 (27) | 794/1901 (42) | 123/183 (67) |
|-------------------|---------------|--------------|------------|---------------|--------------|

\* Non-pneumococcal streptococci † *Staphylococcus* spp. ‡ Bacterial meningitis

**Table S9. Disease Burden per Pathogen and Clinical Setting in Single-episode Bacterial Meningitis, Sweden 2005–2014**

Pharmacological data was available from the year 2005; therefore, data on severe sequelae was restricted to episodes reported from the year 2005 to the year 2014.

| <b>Pathogen per episode (sum)</b>                  | <b>Adults per episode (sum)</b> | <b>Children per episode (sum)</b> | <b>Non-neurosurgical per episode (sum)</b> | <b>Post-neurosurgical per episode (sum)</b> |
|----------------------------------------------------|---------------------------------|-----------------------------------|--------------------------------------------|---------------------------------------------|
| <b><i>Years of life lost, YLL</i></b>              |                                 |                                   |                                            |                                             |
| <i>H. influenzae</i> 3 (342)                       | 4 (342)                         | 0 (0)                             | 3 (299)                                    | 14 (43)                                     |
| <i>S. pneumoniae</i> 7 (6443)                      | 9 (6422)                        | 0 (21)                            | 7 (6227)                                   | 6 (216)                                     |
| <i>N. meningitidis</i> 2 (643)                     | 4 (614)                         | 0 (30)                            | 2 (625)                                    | 3 (19)                                      |
| Streptococci* 4 (1192)                             | 7 (1191)                        | 0 (1)                             | 5 (1192)                                   | 0 (0)                                       |
| Gram-negatives 5 (377)                             | 8 (377)                         | 0 (0)                             | 4 (301)                                    | 5 (76)                                      |
| <i>L. monocytogenes</i> 15 (1866)                  | 16 (1866)                       | 0 (0)                             | 16 (1866)                                  | 0 (0)                                       |
| <i>Staphylococcus</i> spp. 8 (2176)                | 9 (2176)                        | 0 (0)                             | 11 (2020)                                  | 2 (157)                                     |
| Polymicrobial 8 (79)                               | 10 (79)                         | 0 (0)                             | 8 (79)                                     | 0 (0)                                       |
| Bacterial meningitis 6 (13 118)                    | 8 (13 066)                      | 0 (51)                            | 7 (12 607)                                 | 3 (511)                                     |
| <b><i>Years lived with disability, YLD</i></b>     |                                 |                                   |                                            |                                             |
| <i>H. influenzae</i> 3 (377)                       | 4 (333)                         | 2 (43)                            | 3 (369)                                    | 2 (7)                                       |
| <i>S. pneumoniae</i> 5 (4555)                      | 6 (4183)                        | 2 (372)                           | 5 (4278)                                   | 8 (277)                                     |
| <i>N. meningitidis</i> 2 (659)                     | 3 (495)                         | 1 (164)                           | 2 (618)                                    | 6 (41)                                      |
| Streptococci* 4 (1170)                             | 6 (994)                         | 2 (176)                           | 4 (959)                                    | 12 (211)                                    |
| Gram-negatives 4 (297)                             | 6 (279)                         | 1 (18)                            | 4 (251)                                    | 3 (46)                                      |
| <i>L. monocytogenes</i> 4 (456)                    | 4 (456)                         | 0 (0)                             | 4 (449)                                    | 4 (7)                                       |
| <i>Staphylococcus</i> spp. 6 (1761)                | 6 (1578)                        | 6 (183)                           | 5 (975)                                    | 8 (786)                                     |
| Polymicrobial 11 (109)                             | 14 (109)                        | 0 (0)                             | 11 (109)                                   | 0 (0)                                       |
| Bacterial meningitis 5 (9384)                      | 5 (8428)                        | 2 (956)                           | 4 (8009)                                   | 8 (1375)                                    |
| <b><i>Disability adjusted life years, DALY</i></b> |                                 |                                   |                                            |                                             |
| <i>H. influenzae</i> 6 (719)                       | 8 (675)                         | 2 (43)                            | 6 (668)                                    | 17 (51)                                     |
| <i>S. pneumoniae</i> 12 (10998)                    | 14 (10 605)                     | 2 (393)                           | 12 (10 505)                                | 14 (493)                                    |
| <i>N. meningitidis</i> 5 (1302)                    | 7 (1108)                        | 2 (194)                           | 4 (1242)                                   | 9 (60)                                      |
| Streptococci* 8 (2362)                             | 13 (2185)                       | 2 (177)                           | 8 (2151)                                   | 12 (211)                                    |
| Gram-negatives 8 (674)                             | 13 (656)                        | 1 (18)                            | 8 (552)                                    | 9 (122)                                     |

|                                      |             |          |             |           |
|--------------------------------------|-------------|----------|-------------|-----------|
| <i>L. monocytogenes</i> 19 (2322)    | 20 (2322)   | 0 (0)    | 19 (2315)   | 4 (7)     |
| <i>Staphylococcus</i> spp. 14 (3937) | 15 (3754)   | 6 (183)  | 16 (2995)   | 9 (942)   |
| Polymicrobial 19 (188)               | 23 (188)    | 0 (0)    | 19 (188)    | 0 (0)     |
| Bacterial meningitis 11 (22 502)     | 13 (21 494) | 2 (1007) | 11 (20 616) | 10 (1886) |

\* Non-pneumococcal streptococci

**Table S10. The Importance of Specific Immunosuppression for Severe Sequelae in Single-episode, Non-neurosurgical Bacterial Meningitis, Sweden years 2005 to 2014**

Pharmacological data was available from the year 2005; therefore, data on severe sequelae was restricted to episodes reported from the year 2005 to the year 2014.

| Age group                           | OR (CI95%)              | P-value      | Adjusted OR* (CI95%)     | P-value      |
|-------------------------------------|-------------------------|--------------|--------------------------|--------------|
| <b>30-day all-cause mortality</b>   |                         |              |                          |              |
| Age 0 to 4 years (non-neonatal)     | 0.2 (0.1 to 0.4)        | <0.001       | 1 (reference)            | -            |
| Age 5 to 17 years                   | 0.2 (0.1 to 0.8)        | <b>0.02</b>  | 1.1 (0.3 to 4.5)         | 0.89         |
| Age 18 to 64 years                  | 0.6 (0.4 to 0.8)        | <0.001       | <b>3.1 (1.3 to 7.3)</b>  | <b>0.009</b> |
| Age over 65 years                   | 3.9 (2.8 to 5.3)        | <0.001       | <b>8.7 (3.7 to 20.3)</b> | <0.001       |
| Male gender                         | 1.0 (0.8 to 1.4)        | 0.91         | 1.0 (0.7 to 1.3)         | 0.89         |
| Healthcare facility-acquired        | 1.3 (0.9 to 1.8)        | 0.17         | 1.3 (0.9 to 1.9)         | 0.13         |
| <i>Specific immunosuppression</i>   | <b>1.8 (1.3 to 2.4)</b> | <0.001       | -                        | -            |
| Lesions of the CNS†                 | 0.9 (0.4 to 1.6)        | 0.62         | 0.6 (0.3 to 1.2)         | 0.14         |
| Malignant neoplasia‡                | 2.5 (1.7 to 3.6)        | <0.001       | <b>1.6 (1.1 to 2.4)</b>  | <b>0.02</b>  |
| Steroid treatment§                  | 2.1 (1.3 to 3.4)        | <b>0.003</b> | 1.2 (0.7 to 2.0)         | 0.55         |
| Other Charlson co-morbidities¶      | 1.4 (0.9 to 2.2)        | 0.12         | 0.9 (0.6 to 1.5)         | 0.77         |
| Primary immune deficiency           | 0.8 (0.1 to 6.2)        | 0.83         | 0.4 (0.1 to 3.)          | 0.41         |
| Neonate**                           | 0.5 (0.2 to 1.2)        | 0.10         | 1.9 (0.6 to 6.6)         | 0.29         |
| <b>Severe neurological sequelae</b> |                         |              |                          |              |
| Age 0 to 4 years (non-neonatal)     | <b>0.5 (0.3 to 0.6)</b> | <0.001       | 1 (reference)            | -            |
| Age 5 to 17 year                    | <b>0.5 (0.3 to 0.8)</b> | <b>0.004</b> | 1.1 (0.6 to 1.8)         | 0.85         |
| Age 18 to 64 years                  | <b>1.4 (1.1 to 1.7)</b> | <b>0.001</b> | 2.7 (1.9 to 3.7)         | <0.001       |
| Age over 65 years                   | 1.3 (1.0 to 1.6)        | <b>0.02</b>  | 4.1 (2.9 to 5.8)         | <0.001       |
| Male gender                         | 1.0 (0.8 to 1.2)        | 0.90         | 0.9 (0.8 to 1.3)         | 0.47         |
| Healthcare facility-acquired        | 0.9 (0.7 to 1.1)        | 0.28         | 1.0 (0.8 to 1.3)         | 0.76         |
| <i>Specific immunosuppression</i>   | 1.0 (0.8 to 1.2)        | 0.88         | -                        | -            |
| Lesions of the CNS†                 | <b>1.7 (1.2 to 2.4)</b> | <b>0.005</b> | 1.4 (1.0 to 2.1)         | 0.06         |
| Malignant neoplasia‡                | 0.8 (0.6 to 1.1)        | 0.13         | 0.8 (0.6 to 1.1)         | 0.15         |
| Steroid treatment§                  | 0.8 (0.5 to 1.2)        | 0.34         | 0.9 (0.6 to 1.3)         | 0.60         |
| Other Charlson co-morbidities¶      | 1.0 (0.8 to 1.4)        | 0.83         | 0.9 (0.6 to 1.2)         | 0.48         |

|                                   |                         |                  |                  |                  |
|-----------------------------------|-------------------------|------------------|------------------|------------------|
| Primary immune deficiency         | 1.0 (0.3 to 3.3)        | 0.99             | 0.8 (0.2 to 2.6) | 0.71             |
| Neonate**                         | <b>0.6 (0.4 to 1.0)</b> | <b>0.031</b>     | 1.3 (0.7 to 2.2) | 0.41             |
| <b>Severe sequelae</b>            |                         |                  |                  |                  |
| Age 0 to 4 years (non-neonatal)   | 0.4 (0.3 to 0.5)        | <b>&lt;0.001</b> | 1 (reference)    | -                |
| Age 5 to 17 years                 | 0.4 (0.3 to 0.6)        | <b>&lt;0.001</b> | 1.1 (0.6 to 1.8) | 0.85             |
| Age 18 to 64 years                | 1.1 (0.9 to 1.4)        | 0.21             | 2.7 (1.9 to 3.7) | <b>&lt;0.001</b> |
| Age over 65 years                 | 1.9 (1.6 to 2.4)        | <b>&lt;0.001</b> | 4.1 (2.9 to 5.8) | <b>&lt;0.001</b> |
| Male gender                       | 1.0 (0.8 to 1.2)        | 0.80             | 0.9 (0.8 to 1.1) | 0.47             |
| Healthcare facility-acquired      | 1.0 (0.8 to 1.2)        | 0.88             | 1.0 (0.8 to 1.3) | 0.76             |
| <i>Specific immunosuppression</i> | <b>1.2 (1.0 to 1.5)</b> | <b>0.04</b>      | -                | -                |
| Lesions of the CNS†               | <b>1.7 (1.2 to 2.4)</b> | <b>0.006</b>     | 1.4 (1.0 to 2.1) | 0.06             |
| Malignant neoplasia‡              | 1.1 (0.9 to 1.5)        | 0.34             | 0.8 (0.6 to 1.1) | 0.15             |
| Steroid treatment§                | 1.1 (0.8 to 1.6)        | 0.58             | 0.9 (0.6 to 1.3) | 0.60             |
| Other Charlson co-morbidities     | 1.2 (0.9 to 1.6)        | 0.29             | 0.9 (0.6 to 1.2) | 0.48             |
| Primary immune deficiency         | 1.0 (0.3 to 3.1)        | 0.99             | 0.8 (0.2 to 2.6) | 0.71             |
| Neonate**                         | <b>0.5 (0.3 to 0.8)</b> | <b>0.003</b>     | 1.3 (0.7 to 2.2) | 0.41             |

\* Odds ratio estimated with multivariate logistic regression adjusted for healthcare facility-acquired bacterial meningitis (using community-acquired bacterial meningitis as reference), specific immunosuppression and age groups † Including traumatic, neoplastic and cerebrovascular lesions of the central nervous system ‡ Including haematological and non-haematological forms § Systemic treatment ongoing for at least two weeks and reported within one year of admission || Rheumatic disease, diabetes mellitus with end organ damage, moderate to severe liver disease and renal failure \*\* Age < 28 days

## SUPPLEMENTARY FIGURES

### Figure S1. Incidence Rate per Clinical Setting of Bacterial Meningitis in Sweden 1995 to 2014.

The incidence rate of community-acquired (CBM), non-neurosurgical healthcare facility-acquired (HBMF) and post-neurosurgical (PBM) episodes of bacterial meningitis are shown per pathogen on the y-axis. **(A)** All bacteria, **(B)** *H. influenzae*, **(C)** *S. pneumoniae*, **(D)** *N. meningitidis* **(E)** Non-pneumococcal streptococci, **(F)** Gram-negative species, **(G)** *L. monocytogenes*, **(H)** Staphylococcus species. Predicted estimates with a relative standard error of >0.3 and confidence intervals with negative values were suppressed. Predicted incidence rates per clinical setting are depicted as median splines. Py denotes person years.

**A** Bacterial meningitis

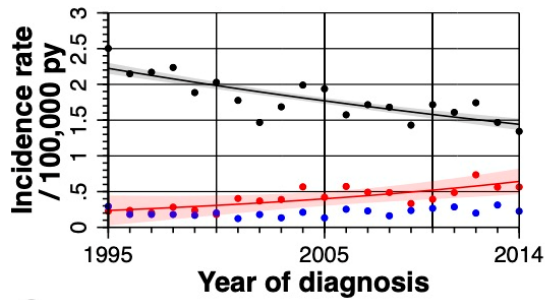

**B** *Haemophilus influenzae*

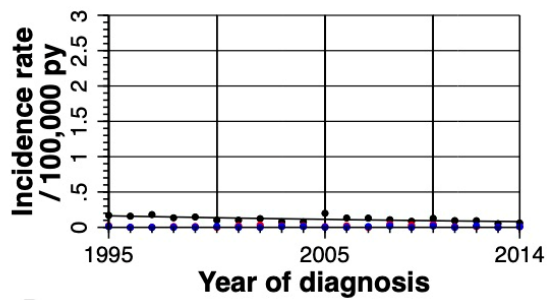

**C** Pneumococci

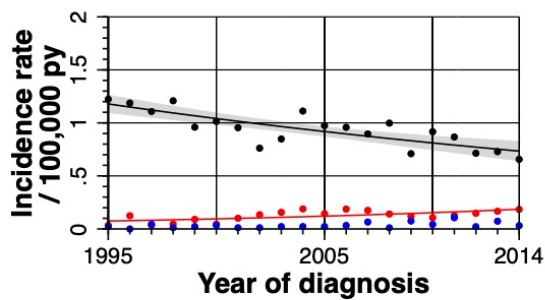

**D** Meningococci

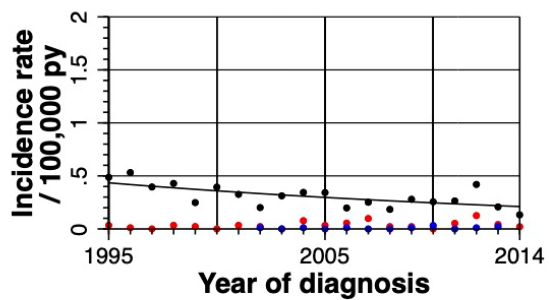

**E** Non-pneumococcal streptococci

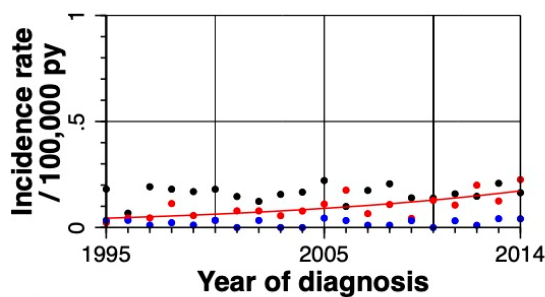

**F** Gram-negatives

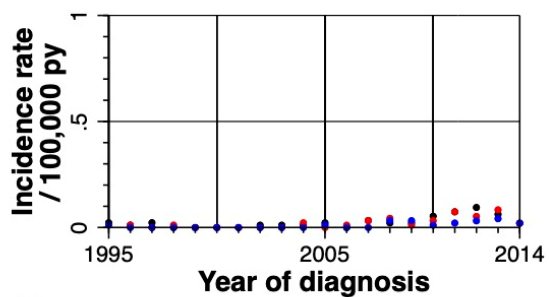

**G** *Listeria monocytogenes*

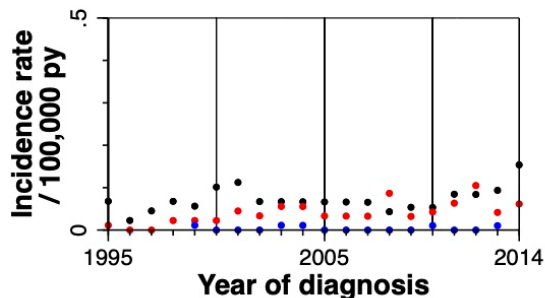

**H** *Staphylococcus* spp.

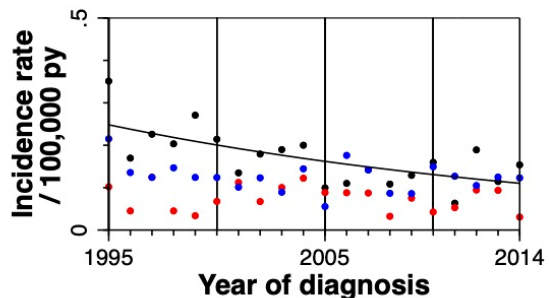

Clinical setting, crude: ● Community-acquired (CBM) ● Facility-acquired (HBMF) ● Postneurosurgical (PBM)  
 Predicted: — CBM — HBMF  
 Confidence interval, 95 %: ■ CBM ■ HBMF

**Figure S2. Crude Incidence Rate and Proportions of Episodes per Clinical Setting in the Conjugate Vaccine Era, Sweden 1995 to 2014.**

The scatter plot shows the annual incidence rate (IR) of bacterial meningitis (BM) in Sweden during the conjugate vaccine era (years 1995 to 2014) per clinical setting on the left y-axis (y1) and annual stacked proportions of clinical settings including the proportion that was of neonatal age and/or had an indwelling intracranial device present at admission on the right y-axis (y2). The annual total number of episodes are shown above for each year. **(A)** all bacterial species, **(B)** *Haemophilus influenzae*, **(C)** *Streptococcus pneumoniae*, **(D)** *Neisseria meningitidis*, **(E)** streptococci (non-pneumococcal streptococci), **(F)** Gram-negatives (except *Neisseria meningitidis* and *Haemophilus influenzae*), **(G)** *Listeria monocytogenes*, **(H)** *Staphylococcus* species. Py denotes person years. PCV denotes pneumococcal conjugate vaccine. CBM denotes community-acquired BM. HBMF denotes non-neurosurgical healthcare facility-acquired BM, a form of healthcare-associated BM. PBM denotes post-neurosurgical BM, a form of healthcare-associated BM that may occur with or without an indwelling intracranial device present at admission.

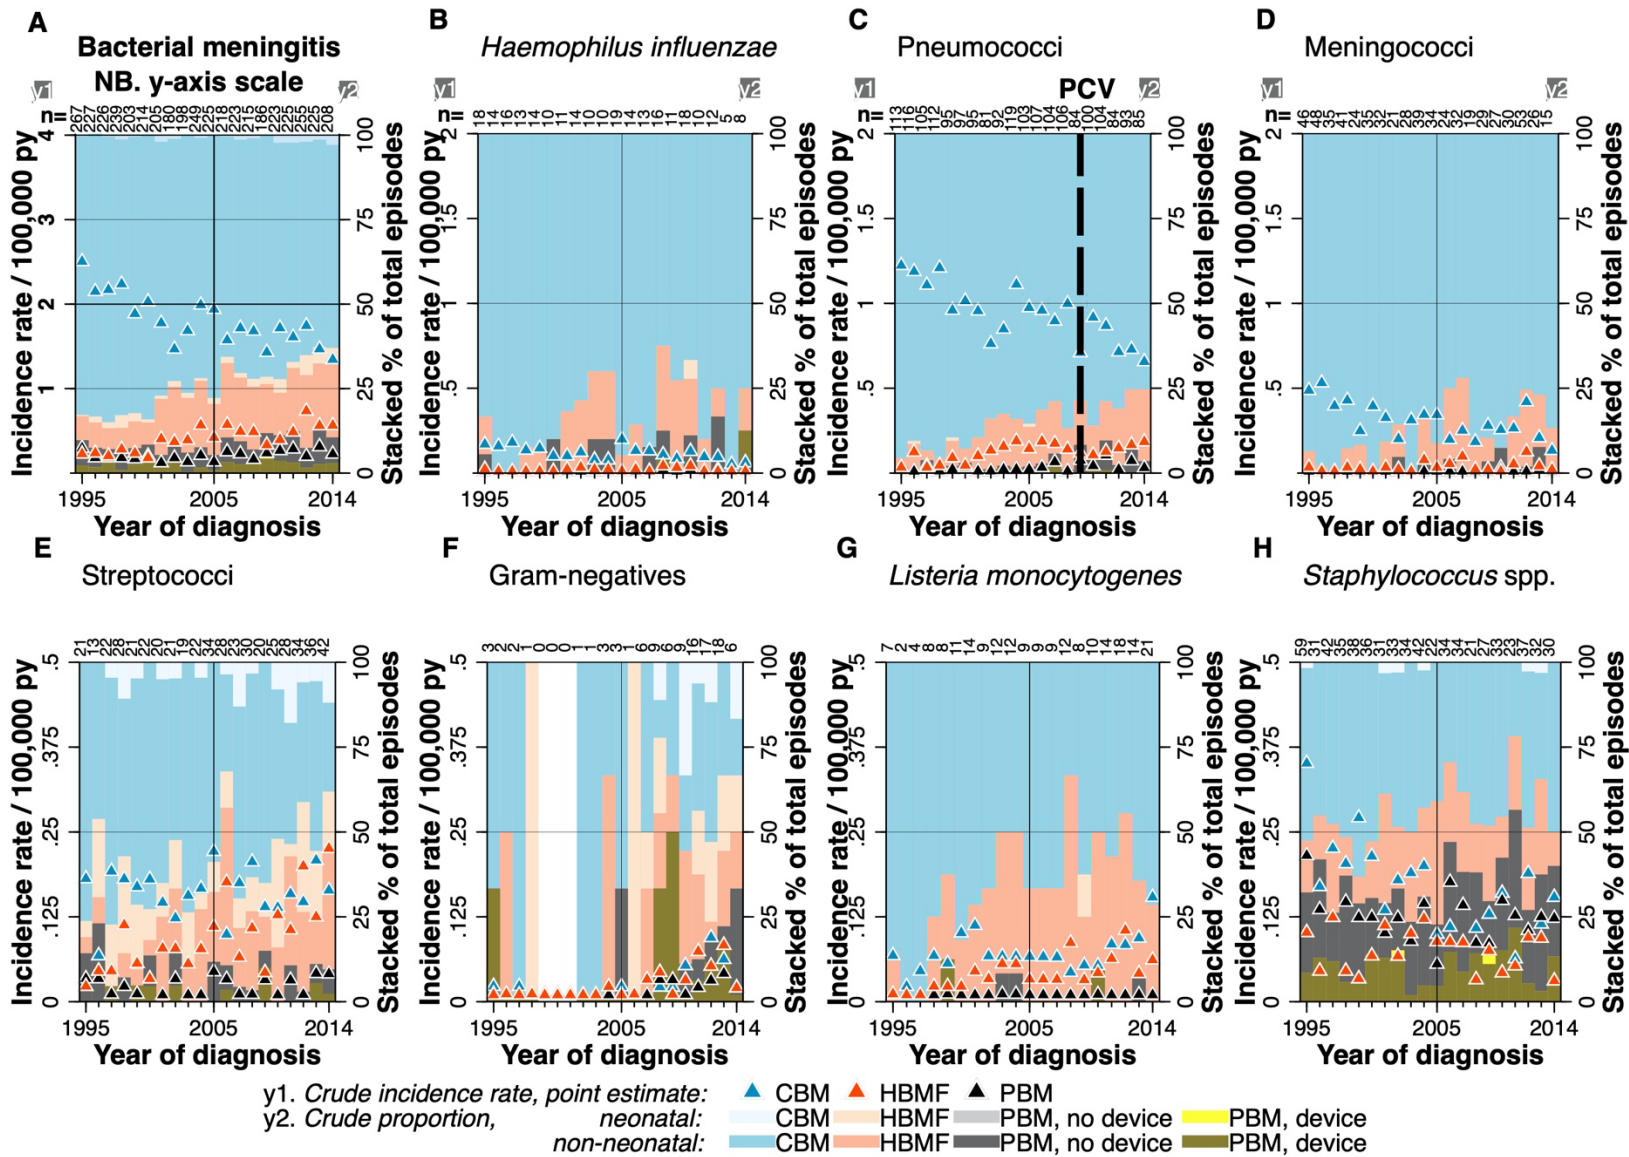



**Figure S3. Median Patient Age and the Incidence Rate of Neonatal Bacterial Meningitis in the Conjugate-vaccine Era, Sweden 1995 to 2014**

(A-C) shows the crude and predicted annual median age at admission among (A) adults, (B) non-neonatal children and (C) neonates with BM during the conjugate vaccine era together with the median age of patients post-PCV (years 2009 to 2014). (D) shows the crude and predicted IR (estimates with a relative standard error of  $>0.3$  were suppressed) of neonatal BM overall and per pathogen. Py denotes person years. CI95% denotes 95 percent confidence interval. IQR denotes interquartile range. Predictions are depicted as median splines.

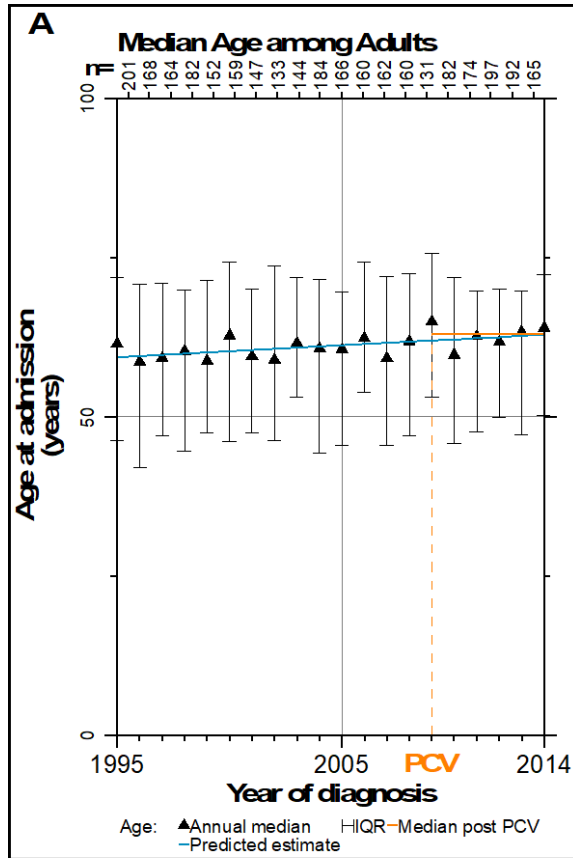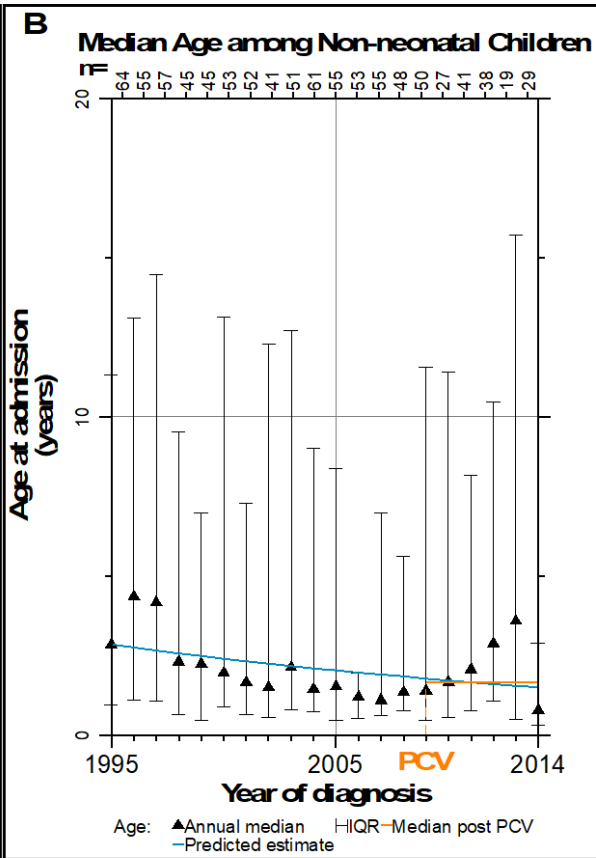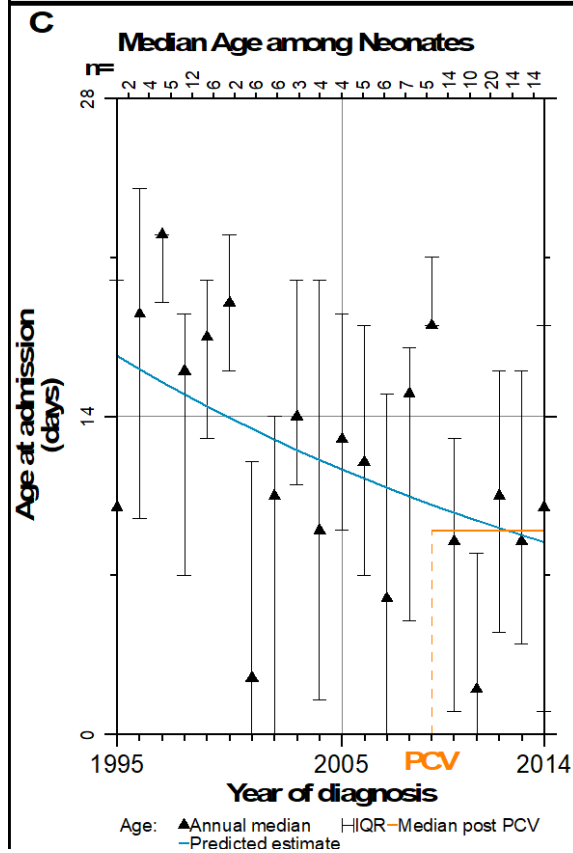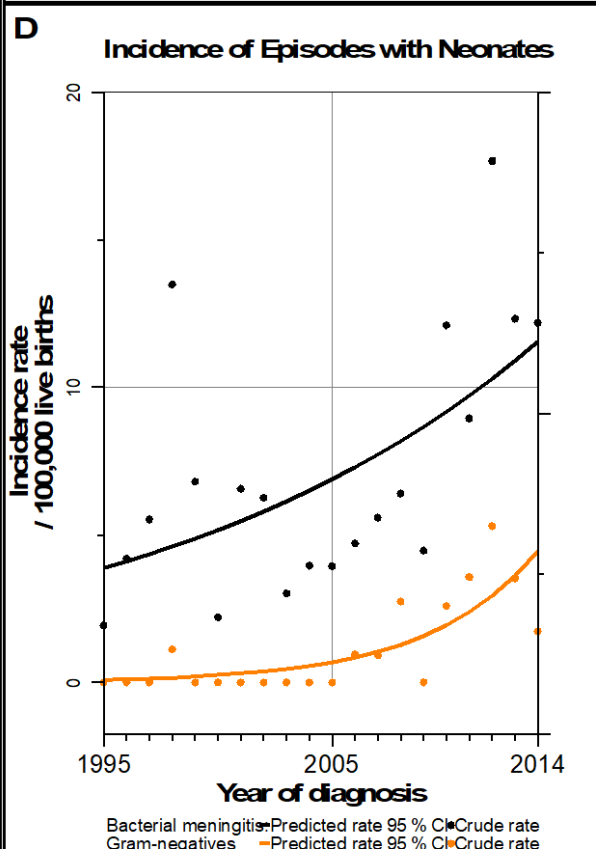

#### **Figure S4. Specific Immunosuppression of Patients with Bacterial Meningitis**

**(A)** Pathogen specific profiles of specific immunosuppressive conditions and high age among adult community-acquired episodes compared to adult non-neurosurgical facility-acquired episodes post-PCV (years 2009 to 2014). **(B)** Pathogen specific profiles of rheumatic disease among adult community-acquired compared to adult non-neurosurgical facility-acquired episodes post-PCV. **(C and D)** Pathogen specific profiles of malignancies and non-neoplastic lesions of the central nervous system (CNS) post-PCV. Traumatic lesions of the central nervous system include basilar skull fracture, compound skull fracture and traumatic para-meningeal bleed. **(E-H)** shows the corresponding estimates as in A-D for children. Post-neurosurgical episodes are excluded as they are per definition preceded by a lesion of the blood-brain barrier, a specific form of immunosuppression. *H. influenzae* denotes *Haemophilus influenzae*. *L. monocytogenes* denotes *Listeria monocytogenes*. Streptococci denotes non-pneumococcal streptococci. Significance levels are shown as  $p < 0.05$  (\*),  $p < 0.01$  (\*\*),  $p < 0.001$  (\*\*\*) and non-significant (NS).

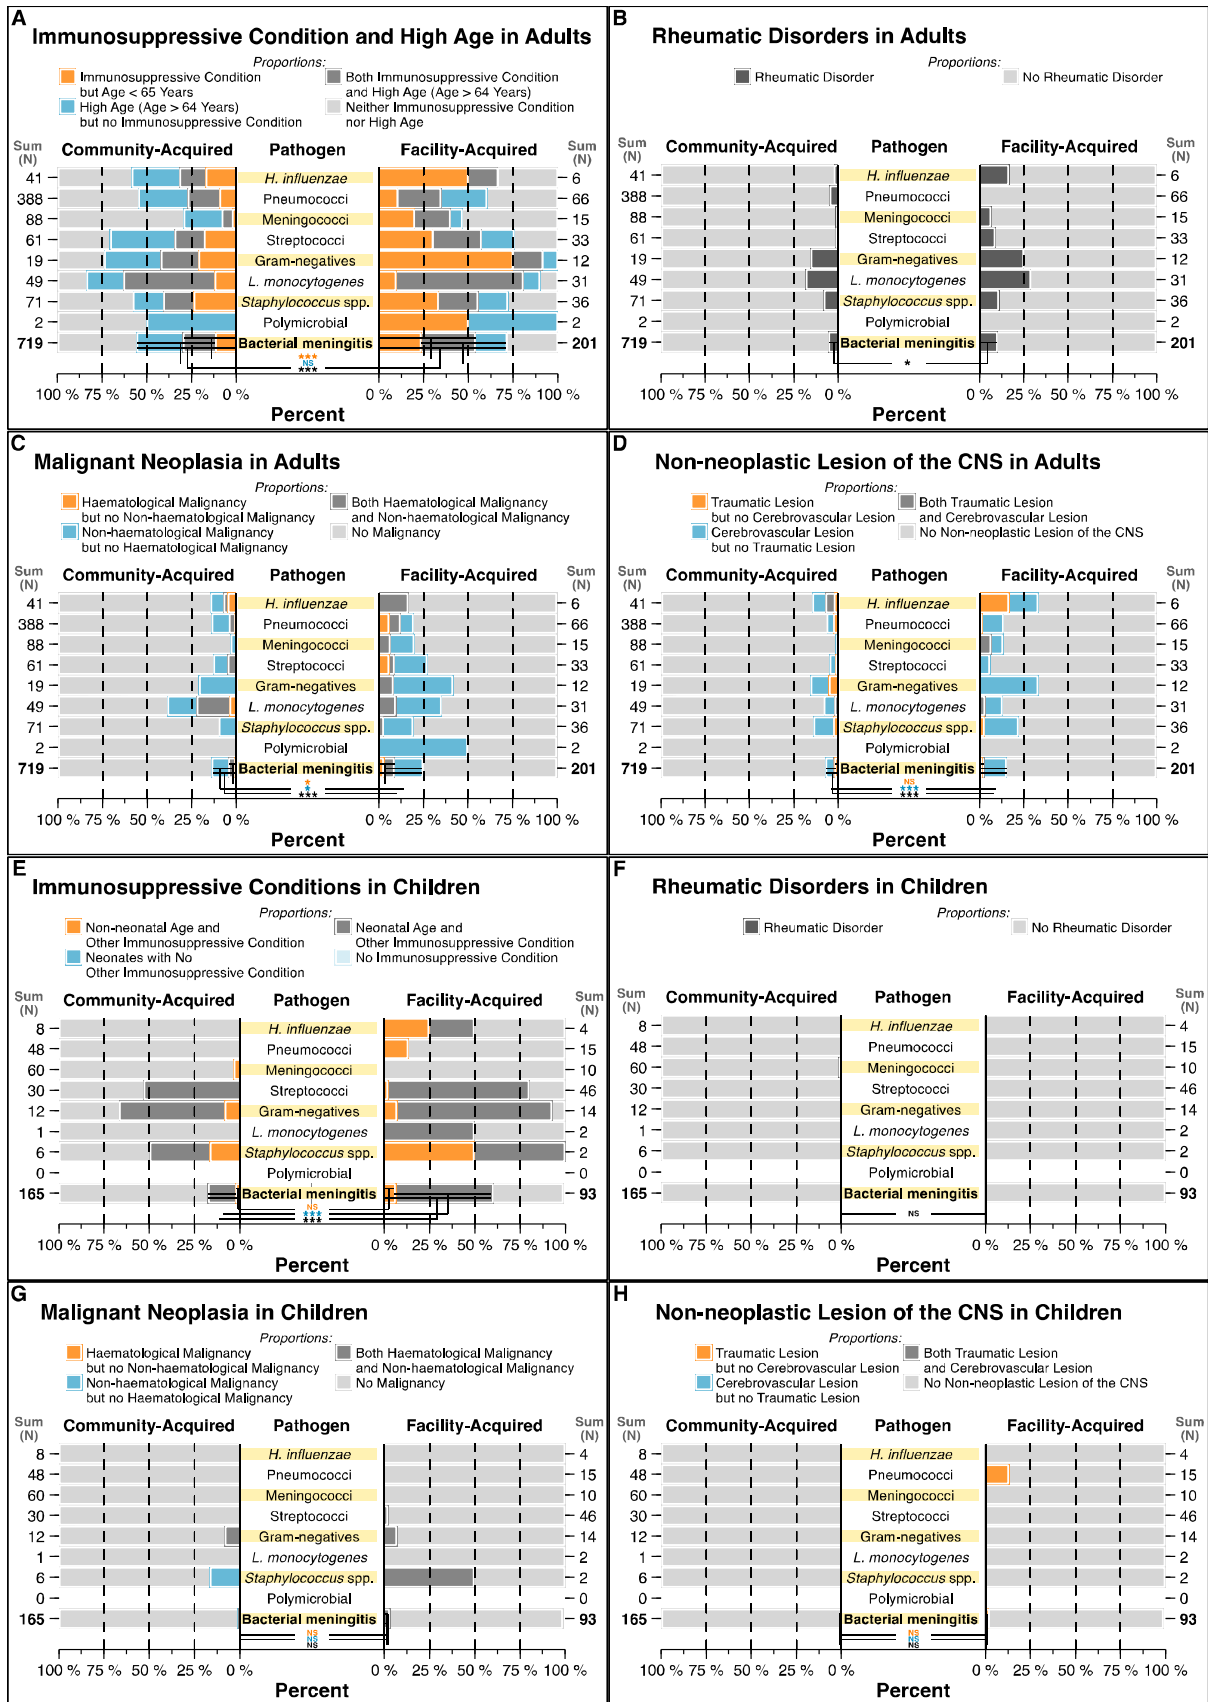

**Figure S5. Distribution of Single and Multiple Severe Neurological Sequelae, Sweden 2005 to 2014.**

The overall frequency (N=746/2084 single episodes of bacterial meningitis) of different neurological sequelae forms is shown adjacent to each coloured field; (**blue**) non-structural forms, (**red**) cerebrovascular lesions, (**green**) hydrocephalus, (**yellow**) non-psychological neurological and (**grey**) psychological. The distribution of single (coloured fields without overlap) and multiple (overlapping coloured fields) severe neurological sequelae forms are shown within the respective fields (n). Categories within the coloured circles are mutually exclusive.

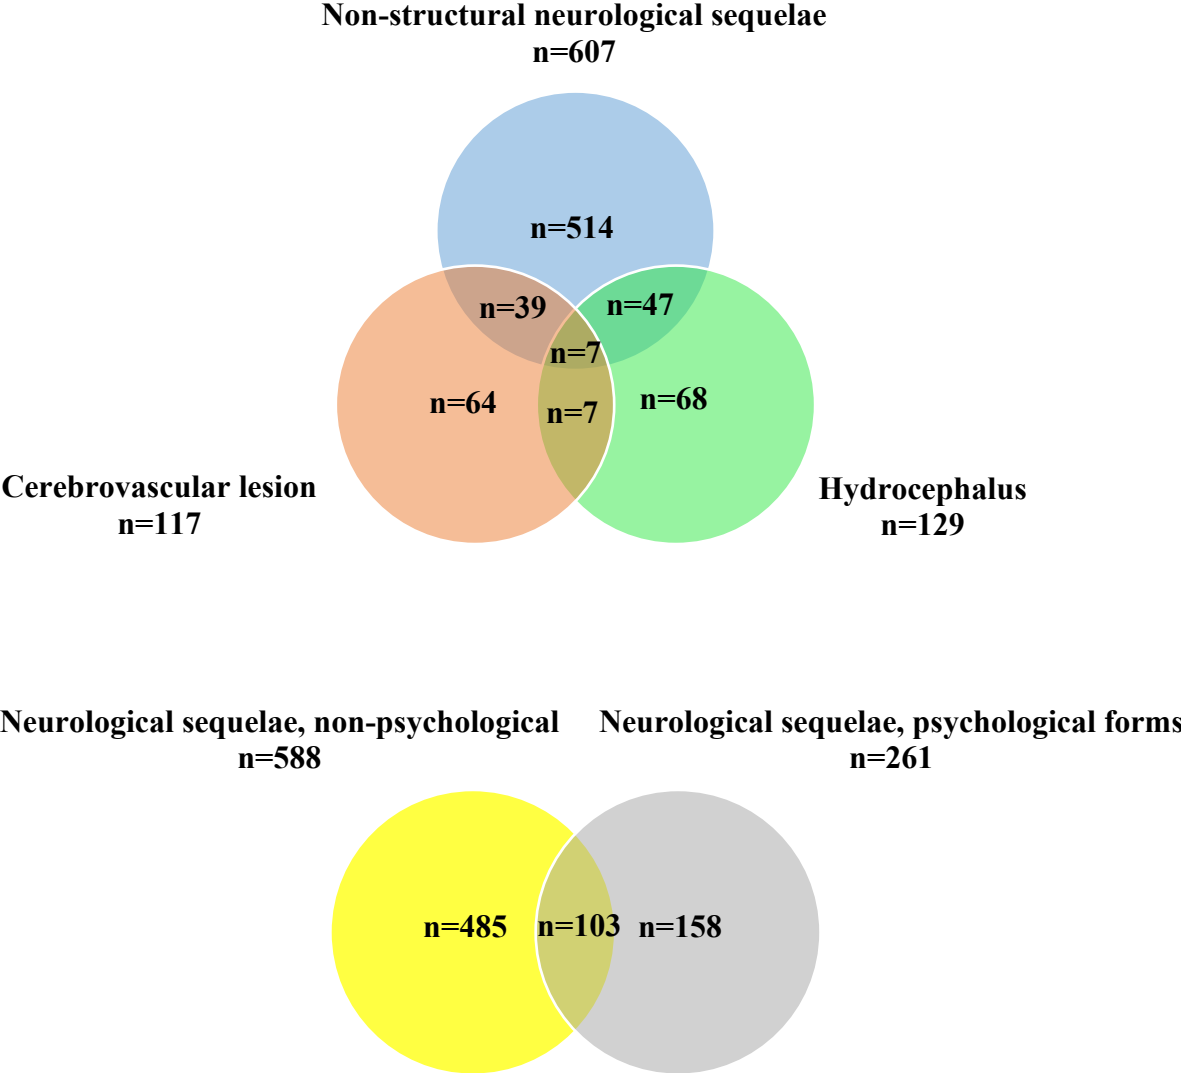

### **Figure S6. Mortality Within 30 Days of Hospital Admission with Bacterial Meningitis**

The scatter plot shows the annual case fatality rate (CFR) in Sweden during the years 1965 to 2014 per pathogen and age group in relation to introduction of the *H. influenzae B* (Hib) and pneumococcal conjugate vaccine (PCV). Fitted lines in colour show the predicted trend of CFR during the period with national coverage in the Inpatient Register (1987 to 2014). The 30-day mortality among patients with RBM was 5% and 2% of RBM-episodes were fatal. Haemophilus denotes *Haemophilus influenzae*, Listeria denotes *Listeria monocytogenes*, staphylococci denote *staphylococcus* spp. and streptococci denotes non-pneumococcal streptococci. Predicted estimates with a relative standard error of  $>0.3$  were suppressed.

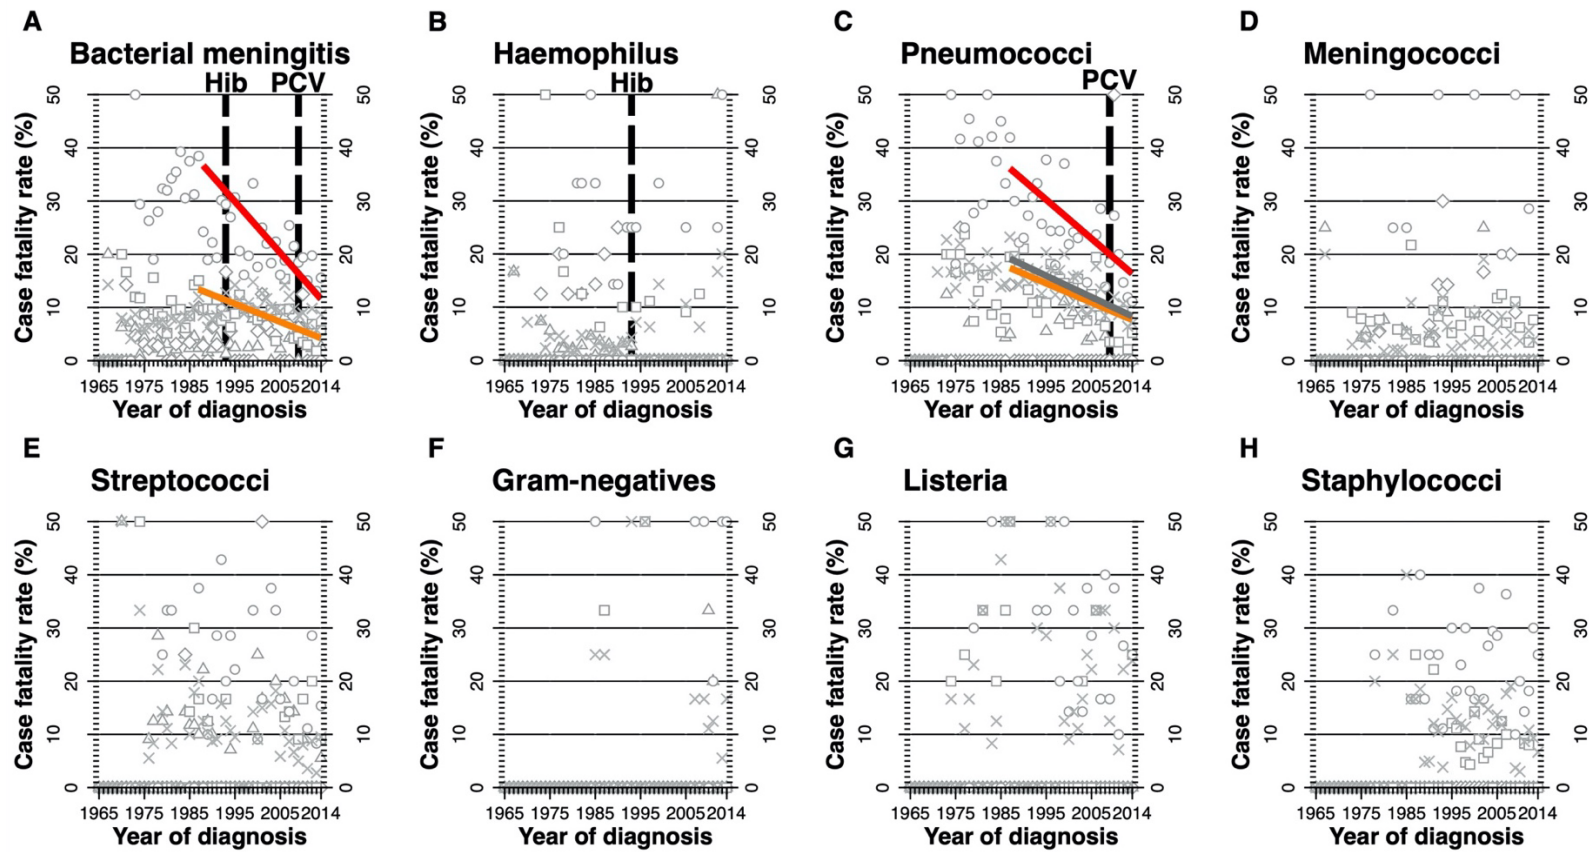

Case fatality rate (CFR) per age group:  $\triangle$  0-4 years  $\diamond$  5-17 years  $\square$  18-64 years  $\circ$  >64 years  $\times$  all ages  
 Predicted CFR per age group, significant trend: — 0-4 years — 5-17 years — 18-64 years — >64 years — all ages

### **Figure S7. Mortality within 30 Days of Hospital Admission with Bacterial Meningitis**

The scatter plot shows the annual case fatality rate (CFR) in Sweden during the years 1965 to 2014 per clinical setting in relation to introduction of the *H. influenzae B* (Hib) and pneumococcal conjugate vaccine (PCV). Fitted lines in colour show the predicted trend of CFR during the period with national coverage in the Inpatient Register (1987 to 2014). CBM denotes community-acquired bacterial meningitis. HBMF denotes non-neurosurgical healthcare facility-acquired bacterial meningitis. PBM denotes post-neurosurgical bacterial meningitis. Haemophilus denotes *Haemophilus influenzae*, Listeria denotes *Listeria monocytogenes*, staphylococci denote *staphylococcus* spp. and streptococci denotes non-pneumococcal streptococci. Predicted estimates with a relative standard error of >0.3 were suppressed.



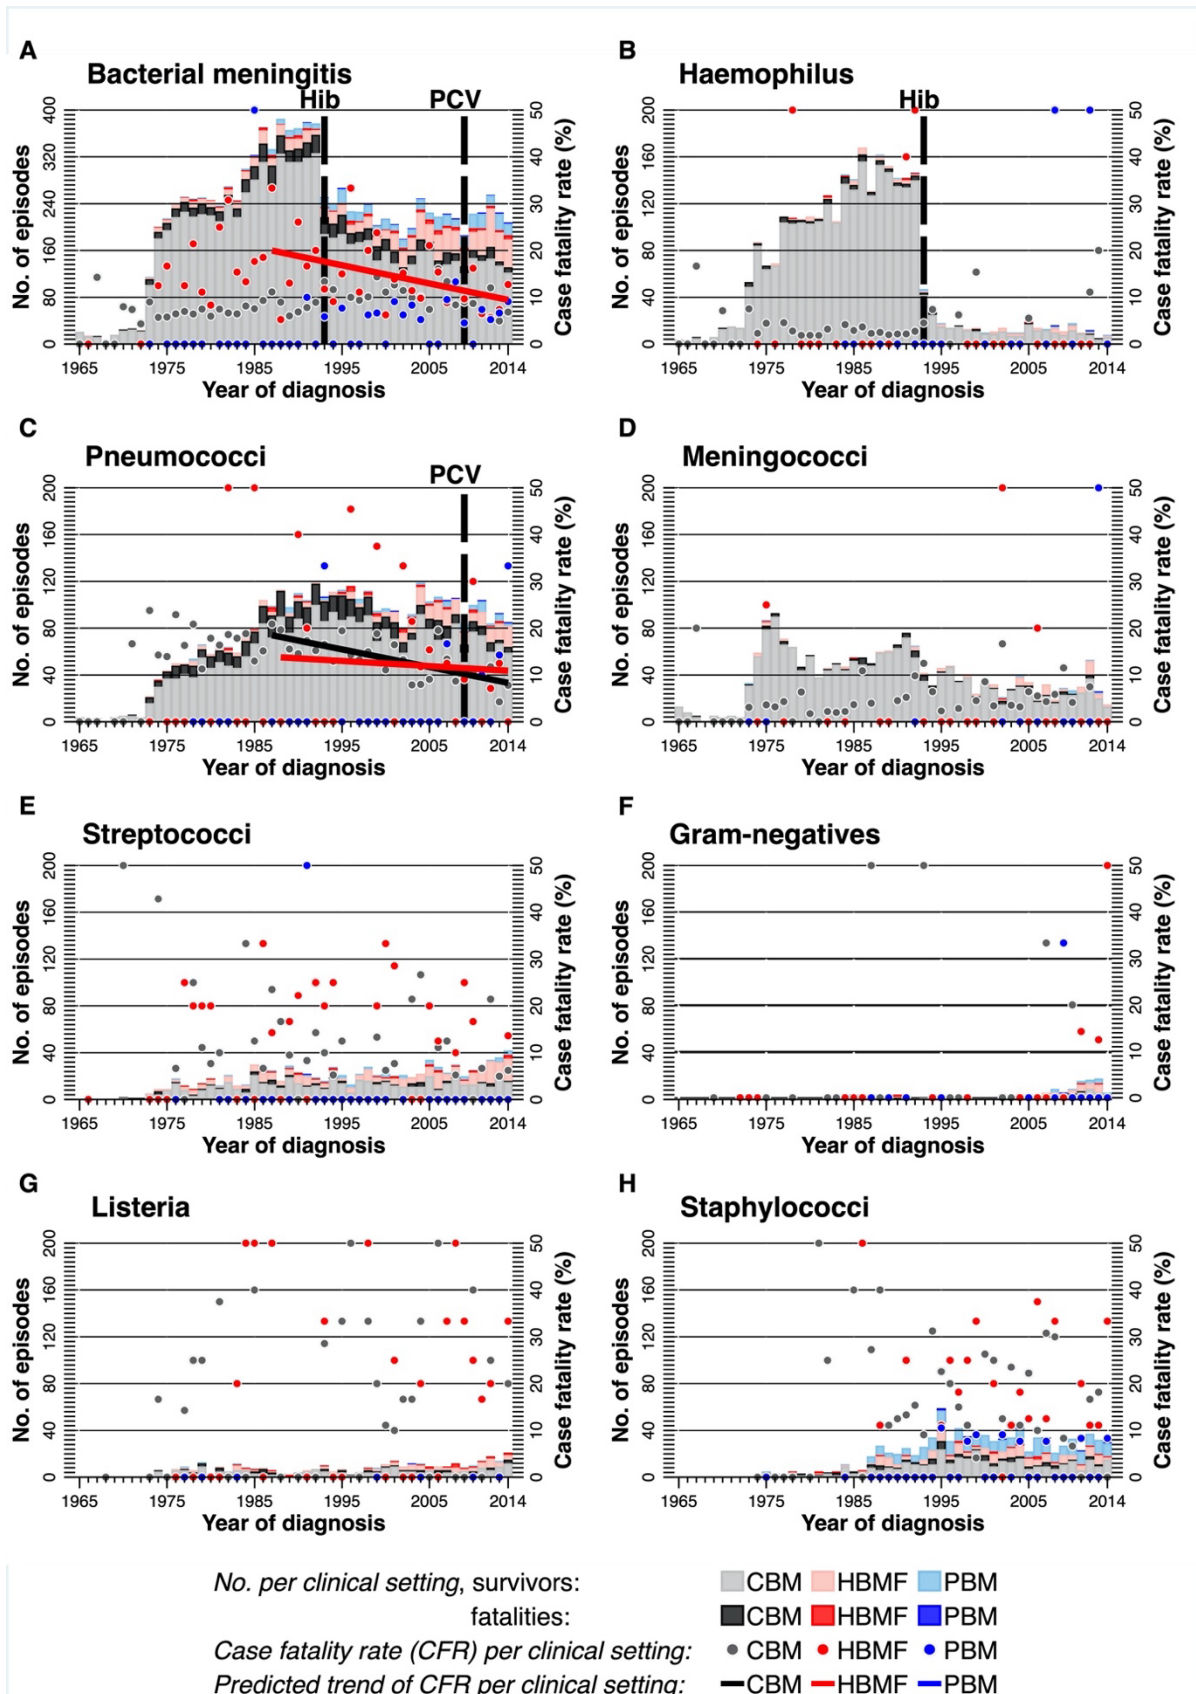

## References

1. Tebruegge M, Curtis N. Epidemiology, etiology, pathogenesis, and diagnosis of recurrent bacterial meningitis. *Clin Microbiol Rev.* 2008;21(3):519-37.
2. Reefhuis J, Honein MA, Whitney CG, Chamany S, Mann EA, Biernath KR, et al. Risk of bacterial meningitis in children with cochlear implants. *N Engl J Med.* 2003;349(5):435-45.
3. Qureshi A, Quinones-Hinojosa A, Ziai W. A rare infectious presentation of a temporal bone meningioma. *J Neurooncol.* 2014;116(3):633-4.
4. Picard C, Puel A, Bustamante J, Ku CL, Casanova JL. Primary immunodeficiencies associated with pneumococcal disease. *Curr Opin Allergy Clin Immunol.* 2003;3(6):451-9.
5. Sjöholm AG, Braconier JH, Söderstrom C. Properdin deficiency in a family with fulminant meningococcal infections. *Clin Exp Immunol.* 1982;50(2):291-7.
6. Kadry H, Noorani B, Cucullo L. A blood-brain barrier overview on structure, function, impairment, and biomarkers of integrity. *Fluids Barriers CNS.* 2020;17(1):69.
7. Keep RF, Zhou N, Xiang J, Andjelkovic AV, Hua Y, Xi G. Vascular disruption and blood-brain barrier dysfunction in intracerebral hemorrhage. *Fluids Barriers CNS.* 2014;11:18.
8. Jiang X, Andjelkovic AV, Zhu L, Yang T, Bennett MVL, Chen J, et al. Blood-brain barrier dysfunction and recovery after ischemic stroke. *Prog Neurobiol.* 2018;163-164:144-71.
